# Supplementary material for: Characterization of novel anoikis-related genes as prognostic biomarkers and key determinants of the immune microenvironment in esophageal cancer
Source: Front Immunol. 2025 Jul 11;16:1599171. doi: 10.3389/fimmu.2025.1599171 (PMC12311635; doi:10.3389/fimmu.2025.1599171)
Supplement: Supplementary file 4 [file Table4.xlsx]

## Sheet: Sheet1
ID	TCGA-L5-A4OR-11A-11R-A260-31	TCGA-IC-A6RF-11A-21R-A336-31	TCGA-V5-A7RE-11A-11R-A354-31	TCGA-IC-A6RE-11A-12R-A336-31	TCGA-L5-A4OG-11A-12R-A260-31	TCGA-L5-A4OO-11A-12R-A260-31	TCGA-L5-A4OF-11A-12R-A260-31	TCGA-L5-A43C-11A-11R-A24K-31	TCGA-V5-AASX-11A-11R-A38D-31	TCGA-L5-A4OQ-11A-12R-A260-31	TCGA-L5-A4OJ-11A-12R-A260-31	TCGA-LN-A7HZ-01A-31R-A354-31	TCGA-V5-A7RC-06A-11R-A406-31	TCGA-V5-A7RC-01B-11R-A406-31	TCGA-R6-A6L4-01A-11R-A31P-31	TCGA-LN-A49O-01A-11R-A24K-31	TCGA-R6-A8W5-01B-11R-A37I-31	TCGA-LN-A9FQ-01A-31R-A38D-31	TCGA-LN-A49P-01A-11R-A24K-31	TCGA-LN-A9FR-01A-11R-A38D-31	TCGA-LN-A4A8-01A-32R-A260-31	TCGA-IG-A4QS-01A-11R-A260-31	TCGA-L5-A8NM-01A-11R-A37I-31	TCGA-LN-A7HV-01A-21R-A354-31	TCGA-VR-A8EZ-01A-11R-A36D-31	TCGA-IG-A3YC-01A-11R-A24K-31	TCGA-Z6-AAPN-01A-11R-A406-31	TCGA-LN-A49W-01A-11R-A260-31	TCGA-L5-A8NE-01A-11R-A37I-31	TCGA-Z6-A9VB-01A-21R-A37I-31	TCGA-L5-A8NV-01A-11R-A37I-31	TCGA-R6-A6Y0-01B-11R-A336-31	TCGA-IG-A625-01A-11R-A31P-31	TCGA-R6-A6XQ-01B-11R-A336-31	TCGA-2H-A9GG-01A-11R-A37I-31	TCGA-2H-A9GN-01A-11R-A37I-31	TCGA-VR-A8EX-01A-11R-A36D-31	TCGA-IG-A5S3-01A-11R-A28J-31	TCGA-Z6-A8JD-01A-11R-A36D-31	TCGA-2H-A9GQ-01A-11R-A37I-31	TCGA-LN-A9FO-01A-11R-A38D-31	TCGA-L5-A8NJ-01A-11R-A36D-31	TCGA-IG-A7DP-01A-31R-A336-31	TCGA-VR-A8EQ-01A-11R-A36D-31	TCGA-LN-A49S-01A-11R-A24K-31	TCGA-LN-A8HZ-01A-11R-A36D-31	TCGA-VR-A8EW-01A-11R-A36D-31	TCGA-LN-A49X-01A-31R-A260-31	TCGA-R6-A6DN-01B-11R-A31P-31
CD44	4.54505	150.488	36.8544	48.5924	11.3744	12.2329	6.49945	5.69381	96.063	34.5606	7.44238	50.4725	74.4733	123.338	33.859	134.632	72.7509	84.1866	652.2	158.828	32.6994	15.7864	53.0713	83.4003	69.2793	72.5469	112.046	115.648	27.9292	93.4078	25.9459	38.2604	98.0969	23	12.2758	60.0639	92.8253	41.7119	65.3249	4.36618	41.6703	49.3591	51.9965	58.0063	99.8784	152.117	85.4164	79.897	118.486
XDH	0.132778	7.44863	7.44503	2.88179	0.22449	0.0287308	0.309354	0.173425	0.835227	0.00803033	0.598044	0.101967	0.940218	2.18775	12.5499	4.4341	1.47067	1.50847	2.50608	2.44992	1.19298	1.60799	8.51292	0.522018	0.182755	2.26218	9.77227	2.86396	2.1125	2.25201	3.86279	19.463	0.948338	3.05665	1.96301	2.00835	9.92311	3.01878	1.9641	4.09697	3.56318	1.15903	0.250527	3.41112	13.1374	3.10456	2.11702	1.47639	5.4057
MMP7	1.38025	3.12605	9.63597	13.7197	1.69259	0.0447992	1.61673	0.183958	31.9194	0.00834767	0.59566	2.10668	2.31851	0.223559	3.85105	4.81848	19.8357	10.447	13.7263	83.8492	140.029	2.60308	1.72659	1.7231	1.49833	99.3703	4.93392	10.4472	0.106413	1.8666	37.7805	0.282238	3.11063	8.96354	3.1172	19.6731	7.41487	6.45705	6.88659	0.144958	8.16035	49.3466	127.19	3.23394	5.78236	2.62949	5.42784	7.53678	22.6252
NOS2	0.0280901	0.147141	28.1451	0.0541546	0.120197	0.166138	0.0196578	0.0460489	3.64623	0.176456	0.243752	0.0368519	1.87622	5.7036	2.23358	0.0528842	3.37153	0.254035	0.0574103	0.474088	0.483271	2.71558	37.7843	0.071531	0.374281	0.205598	0.0332525	0.204963	0.75608	1.32588	0.438846	5.015	0.370999	1.12231	0.512727	4.09818	2.26207	0.559049	0.202442	7.11214	0.450719	1.02136	1.03691	9.51482	1.34977	1.91236	0.196596	0.194268	0.268927
MET	7.62975	8.98068	15.0961	1.84737	8.87082	8.47156	19.4644	5.16941	19.2133	6.37756	5.68949	3.67735	23.6851	21.2549	13.2855	39.5829	18.7855	17.9515	12.4891	28.0192	11.0425	14.831	40.0022	7.36492	14.769	9.02422	12.8169	11.1645	8.85939	16.9508	38.6277	8.91673	13.942	29.7779	13.101	22.5553	10.785	3.8328	31.8563	7.61356	11.277	34.3133	8.36796	21.173	10.163	27.0429	11.5833	23.8635	326.612
ITGA3	7.28614	53.573	30.4011	7.09623	9.31478	15.3417	18.1003	5.10298	15.333	18.0325	7.27416	16.3125	17.9336	23.2494	19.9054	178.175	59.064	43.8493	6.98364	152.7	17.8953	13.777	40.4332	52.1225	9.29674	38.531	73.4197	42.6197	40.8779	20.036	27.801	29.1479	8.34624	10.7414	14.411	21.7787	24.254	17.1828	66.2891	18.4086	30.0946	113.026	28.9341	31.2828	21.4414	45.7776	15.1363	68.4892	60.9324
BRCA1	0.384262	0.909636	2.41887	0.723075	0.667204	0.914335	2.97512	0.351985	3.5931	0.734732	0.876373	7.24184	6.77833	5.08616	2.98014	13.591	7.19118	5.88535	4.35372	4.65005	8.64641	2.78468	6.34301	3.34619	7.6237	2.69769	1.97324	6.21303	4.12711	7.012	2.13553	2.01689	5.33411	4.84915	2.62346	4.12026	3.25465	6.01915	4.21865	3.62294	6.34096	6.80605	2.73278	1.92215	3.68735	6.81591	4.24182	8.80704	9.83038
C5AR1	0.629386	0.586806	2.63743	0.284644	5.22184	3.16802	1.87772	1.22364	0.964295	13.8948	0.867731	4.50051	4.07897	2.31978	0.540502	7.38131	11.8038	6.31326	26.7287	8.20492	5.5113	4.77925	14.5158	3.51755	2.33224	10.8423	5.4766	11.8205	1.36693	1.93505	6.71154	3.025	7.00144	0.767722	6.35375	7.70307	1.25954	1.06801	1.4985	2.83563	6.83378	0.585305	10.819	10.2813	1.37094	1.37078	2.53292	6.94709	4.1459
ELANE	0.095091	0.144903	0.0625709	0.0157136	0.618477	0.472426	0.0598913	0.124708	0.0242818	2.79179	0.154716	0.0748509	0.0225828	0	0.03373	0.0113068	0.029645	0.02319	0.0613725	0	0	0.0523642	0.0130054	0	0.0638834	0.143549	0.0519539	0.0640472	0.0218604	0.0129785	0.130841	0	0.0824192	0	0.0578564	0.023058	0.0176374	0.11355	0.042173	0.0163783	1.08362	0.0171448	0.0604619	0.0614103	0	0	0	0.0746509	0.0642619
NUDT1	0.74728	2.23298	3.48044	2.7167	1.12715	0.97787	1.51004	0.60231	2.60589	1.51946	0.965079	16.6246	6.78818	5.72945	10.4868	8.00809	5.36311	6.08796	6.92704	5.69569	4.28233	3.57498	4.29256	6.2226	20.4202	9.39007	13.851	11.0982	6.31335	11.1618	4.04863	5.46988	3.00138	10.8988	3.97835	6.73849	13.7046	7.49427	7.74693	3.67628	8.64415	12.3787	5.43446	5.67655	11.3587	18.3192	14.2206	7.21265	15.005
PDCD4	51.5318	30.4096	17.9303	41.8529	47.1107	20.9076	59.3296	30.8353	22.5792	14.419	49.4214	23.9487	17.3437	15.263	24.5092	5.75929	13.3687	12.5593	21.8258	6.10267	17.3141	19.447	6.91852	10.5932	6.79108	24.1399	23.5717	17.1153	1.72732	15.5426	9.82825	26.4841	22.6558	13.4718	8.46953	11.5573	28.7142	17.9157	13.2149	15.1262	23.9243	10.0044	16.0342	21.7226	34.6798	19.4827	25.779	8.37838	5.11404
SIRT6	2.61658	5.09095	6.62385	3.47183	3.41593	2.25911	4.13842	2.69096	5.57541	2.96058	2.70502	11.3087	3.9983	4.79824	7.53953	5.37587	4.7967	6.55645	5.44207	5.44361	7.86245	9.12947	6.94621	7.32582	14.0251	7.09514	9.70439	5.52805	16.2597	7.16163	6.9617	6.88103	4.05199	5.21869	7.28783	3.74223	6.45362	2.50778	9.02232	3.72744	4.12791	6.71604	7.83533	10.5601	5.03986	5.50217	6.45431	4.38993	5.9922
DUSP4	23.0503	1.0956	4.63121	2.09905	22.2048	10.3132	45.9775	19.8386	8.75225	0.391467	17.8729	1.81737	1.18523	0.663578	9.52506	16.4605	7.64852	0.635649	3.45492	1.44284	1.37276	18.0399	33.9793	0.950844	0.70405	4.87107	6.53827	2.93411	12.5291	0.391598	24.5512	9.30214	1.44272	19.5177	9.9537	6.75146	2.74081	6.73362	3.63373	0.482579	3.76607	9.14151	6.8547	26.1114	1.13219	1.37996	0.398489	12.0477	12.393
MAOA	29.7009	45.3308	29.9826	16.5422	26.4803	30.5196	43.002	19.2254	19.1029	24.5272	24.8211	29.1612	15.0848	13.9636	15.9886	3.46936	4.38456	9.45939	12.1525	9.47439	3.25168	18.4985	28.894	10.8667	13.0132	9.67804	36.6286	6.15289	3.72781	23.8527	11.5422	13.8082	81.725	10.1519	26.0021	1.96601	22.1754	3.36537	1.53715	0.569555	39.8681	7.34901	3.51551	12.5803	39.8917	23.0284	38.1659	2.17555	0.215105
CDK1	1.03448	3.30149	7.66606	2.78609	1.44288	0.427994	9.92986	0.50006	6.20392	0.643757	2.68249	28.1166	13.1105	9.80923	14.1088	49.4977	26.3818	17.9265	14.9454	8.03931	25.2367	16.46	19.5935	26.2086	22.1224	9.30642	20.9097	27.9843	18.7538	14.092	8.64817	6.96335	16.4084	26.2648	7.13762	24.7166	9.87974	19.6541	19.7083	20.8245	16.9391	27.7039	4.75398	13.9846	17.7415	22.2969	15.7946	12.3686	41.4786
GKN1	13226.1	0.0648217	0.209931	0	8183.16	2171.18	6149.7	3086.51	0	0.118139	2928.52	0	0.505116	0.410893	0	0	6.46281	0.0207479	0.0109819	0.11057	0.00860997	0	0.0465432	0.0129988	0	39.4753	0.0185931	0.0687629	0.0391167	0.0116117	14.9986	0.054867	0	0.0150516	129.564	0.0515744	0.0315601	0.114291	0	0	0.635191	0.0460179	0.0180316	0.175818	0.0890143	0	0.863825	0	19.0997
TF	2.32828	1.14786	0.289134	7.00836	0.19144	0.289586	0.165332	3.00605	0.00437158	0.168672	1.19402	0.11679	0.608499	0.968761	0.506048	0	0.168416	0.157259	0.975276	0.0259579	0.0808522	0.0146648	0.0593161	0.359223	0.0383375	7.36784	0.0349198	0.0768716	0.205965	0.118387	0.102076	2.25671	0.124359	0.0444219	0.395815	0.438648	6.09034	0.64225	0.0265741	0.0471787	0.583024	0.0164622	0.089501	0.0191637	4.26703	0.0148859	0.137343	0.0179197	0.0987255
CLDN6	0.0112425	0.032122	0.147954	0	0.0192426	0	0.0236029	0	0.150718	0.00557551	0	0.0176991	0.0133497	0.0814461	0.00996963	0.0534716	8.97838	0.0479802	0.014512	0.0304402	0.472172	2.06365	0.0153761	0.0429433	0.0151057	0.0154288	0.171989	0.106011	0.0258453	0.115083	0.328719	0.0145008	0.0278409	0.0696146	0.333464	0.279427	0.0104263	0.0335622	0.255536	77.3103	1.08235	0.0912155	0.0119139	0.130688	0.0326744	0.0266607	0.112741	0.0252168	0.136757
GSTP1	60.5	538.97	199.46	464.202	82.2854	50.6395	74.5357	38.6943	182.559	53.2991	47.1247	725.147	321.066	377.816	300.789	221.791	184.665	439.888	322.162	326.288	528.826	245.502	180.087	871.291	808.642	610.631	607.531	130.993	191.48	425.283	280.229	441.21	424.785	501.859	133.076	206.265	820.302	149.607	206.157	74.9616	429.997	284.483	109.293	372.113	469.936	558.97	870.717	211.492	336.267
KIF14	0.083286	0.698539	1.91811	0.381807	0.241418	0.0595876	1.14783	0.0675324	1.5659	0.163884	0.74967	3.40058	2.43732	2.93734	3.45934	5.44352	5.96631	6.02453	2.91482	5.72202	10.839	1.69399	3.70937	3.28802	3.28676	3.49716	2.94603	3.11243	4.6276	3.65587	1.59651	0.907905	4.20815	4.45844	1.7838	6.53584	1.65691	8.06655	4.99698	4.03512	7.16041	3.73956	0.925304	2.0248	1.92864	4.29098	3.132	6.00804	4.52996
KRT15	0.802052	30.2125	0.284353	143.588	3.17634	0.220827	1.87837	0.0423162	0.379599	0.00411479	5.91059	108.124	153.59	125.957	35.8197	8.26413	1.60229	59.0553	6.93652	13.8026	108.942	12.7221	1.14234	81.0359	41.7574	80.6038	16.8605	172.303	1.28115	134.268	2.64956	68.229	84.7355	3.76026	0.643647	0.652193	224.167	65.8203	16.628	4.18243	106.149	27.6328	0.337049	0.321498	323.341	130.123	276.36	7.63333	3.24652
MAD2L1	0.336729	1.96307	3.32357	1.15503	0.553057	0.371156	2.61354	0.200731	3.82373	0.386281	1.51909	7.6197	12.0518	8.68996	5.87558	7.54873	11.7896	4.90224	7.21792	4.10555	14.378	4.88544	10.5365	4.31336	13.6189	4.15669	7.00222	5.53253	13.15	9.13135	2.10894	3.9352	4.6874	6.45075	5.37026	9.42289	5.11954	14.378	7.46134	5.93158	12.069	6.36555	3.38096	3.41788	5.20363	6.84394	10.4266	6.60108	8.21283
NFE2L2	47.1388	114.308	38.2559	61.5883	56.6026	28.5917	77.8485	28.6998	30.6166	34.6497	37.8002	61.0271	117.693	131.22	43.2922	22.4711	19.9922	77.2774	110.78	43.7615	37.2301	32.1236	23.8903	22.772	64.1014	44.0805	40.5866	31.5911	24.1714	195.351	33.0018	42.2158	94.361	49.0655	23.9413	40.844	64.4709	34.2389	24.59	31.4407	53.5839	14.456	23.0677	20.4393	68.0253	50.7945	147.583	29.0275	17.7025
KLF4	23.7825	148.97	41.25	108.528	27.3172	29.7833	58.2254	14.0848	38.8172	35.7836	14.3617	5.3625	6.35101	42.2924	40.6114	106.71	11.9852	14.5551	65.0049	12.5894	12.6533	27.4914	28.292	14.156	3.34194	27.7985	31.5606	16.1803	36.6844	82.9174	79.9435	79.417	41.462	63.803	14.7228	17.1542	80.85	16.4694	25.4033	6.28565	20.1772	26.4349	13.9179	93.0987	32.5768	61.9862	92.1945	36.7661	17.8486
IFI27	16.4533	48.0206	78.3407	2.23587	16.8969	10.6068	12.9461	6.30129	18.154	10.2265	9.16243	238.054	4.78074	18.4913	77.5429	118.185	19.0111	9.95939	102.062	13.0022	59.5956	107.358	52.6367	40.3879	113.098	128.456	61.7722	76.4143	47.0124	53.5059	60.0639	50.6831	30.1151	12.4859	44.1447	2.26062	77.457	14.4927	106.16	1.24237	111.634	91.5796	120.548	52.7751	88.9566	70.0866	27.3821	48.9701	78.9134
PDGFRB	2.47637	1.94366	2.49874	2.27014	13.1774	10.1075	6.17954	3.10157	2.42902	61.381	4.52386	15.8594	10.1991	19.0348	2.5458	18.3952	38.0359	45.1968	19.7149	67.6377	48.3387	7.63798	17.3783	3.13906	15.7219	32.9866	7.05979	38.9785	10.12	9.20118	19.0227	9.42851	15.1446	1.57507	26.9881	40.8893	1.93583	10.4778	56.821	20.0264	8.99625	3.97837	89.7704	11.7184	3.01101	12.4937	7.00839	51.2621	7.55673
CMA1	0.0208652	0.596159	0.0858096	0.48271	3.01773	1.90663	0.941813	0.13682	0.0532801	10.1304	0.577122	0.147816	0.260148	0.125965	0.0925144	0.124049	0.0542069	0.152653	0.201999	0.0903916	0.095022	0	0	0.239098	0	0.272029	0.0455997	0.435657	0.0599587	0.0854337	0.197378	0.0269124	0.245436	0	0.0158688	0.0126487	0.135453	0.358161	0.0809703	0.0359379	0.102487	0	0.818117	0.0269497	0.157667	0.0494802	0.0261548	0.198902	0
MEGF11	0.0895179	0.0549431	0.279793	0.0295853	0.146409	0.111184	0.135733	0.06957	0.0812754	0.087803	0.213618	0.0109611	0.105115	0.0600473	0.0599781	0.0177402	0.0806219	0.0266822	0.0436527	0.00323172	0.0734817	0.087636	0.0299277	0.0471109	0.0414293	0.0505053	0.0130424	0.0964696	0.104039	0.0488714	0.0479004	0.128291	0.0812834	0.295629	1.16193	0.675317	0.0368972	0.639886	0.0319816	0.0942236	0.338082	0.0986332	0.0569183	0.0629499	0.0462521	0.033022	0.0162084	0.0278872	0.0241982
HRAS	4.71368	34.2572	5.69851	14.1148	5.87495	5.10801	6.71915	4.42546	2.7466	6.28607	6.68277	28.6703	12.8535	20.7538	13.924	21.9616	8.90912	16.8444	11.1413	29.1974	19.5936	14.4206	10.6076	68.8861	16.8892	19.8191	35.4732	17.3231	8.98174	28.6268	11.8435	18.9331	17.9599	6.96808	12.5834	11.8518	24.9672	24.1219	17.1755	8.86344	10.7323	11.7689	7.86713	19.0751	18.2844	31.6588	20.0723	14.0733	14.9511
ITGB2	1.21383	0.460227	5.18596	2.72355	4.55887	1.69441	0.510276	1.54977	1.0797	3.91285	0.886851	8.41127	6.99493	1.22943	0.461679	9.34557	18.205	6.0291	23.9907	8.36128	4.80306	5.06335	7.74988	2.21277	3.28119	27.6418	6.86918	27.2138	1.83496	3.32124	8.26181	4.41861	3.68084	0.150119	5.27867	4.44465	2.38745	3.85764	3.15889	1.36736	5.84351	1.3406	44.4268	7.25941	4.32196	1.25849	4.39879	8.86622	7.42739
LAMA1	0.0123177	0.0093851	0.0780126	0.0203548	0.0390035	0.020763	0.0517207	0.0282699	0.0330265	0.0500918	1.38285	0.172587	1.53724	0.696038	0.0131078	5.98819	0.304009	0.22079	0.153434	11.0587	8.66435	0.100615	0.101922	0.945712	0.132404	0.488536	2.07349	3.63135	0.0410599	0.249656	0.0847431	0.105653	0.846476	0.00762726	0.72603	0.725804	0.0925299	13.6167	0.435669	0.0859242	0.514278	0.00777306	0.184052	0.0365924	0.0995223	3.15401	1.63823	0.325327	0.0374591
ITGA2	1.35199	14.5217	9.34756	8.7507	2.36482	1.08103	4.54043	0.856288	14.1171	4.43605	3.61729	3.14012	9.91852	18.4743	16.204	36.3852	29.7033	26.832	18.4216	61.6234	17.7058	6.2201	34.8368	15.774	9.22731	25.2703	14.1455	8.68495	11.7036	13.1446	14.8809	11.7238	40.0773	18.0223	3.57535	20.3863	6.85138	30.2578	18.8131	2.43933	12.7426	16.6623	8.20611	4.5795	14.5292	15.8182	10.9693	35.8952	23.899
NKX2-1	0	0	0.025404	0	0	0.0109604	0	0	0.0039434	0	0.0402017	0.0291741	3.62713	0.223752	0	0.0293798	0.00962878	0.410503	0.127577	0.254225	0	0.0113387	0	0.00471901	0.0290493	0.00847728	0.0303746	0.00416054	0.0106505	0.037939	0	0	0.0305942	0.049178	10.3966	0.0449358	0.0515582	0.119864	0.0102734	0.0265986	0.175981	0.00556868	0	0.00398924	0	0.974134	0.0154863	0	0
TRIM16	2.14226	10.8617	6.1044	17.2877	2.37622	1.13479	4.23919	1.31837	2.58469	1.2498	1.79634	18.4072	24.5899	18.6251	11.5059	6.78031	3.6743	13.8851	7.42549	7.70569	8.82288	4.12318	7.53103	3.89545	14.0101	4.73341	13.462	1.9542	16.9919	14.0918	11.3399	19.8695	8.53278	6.9637	1.18109	5.85446	16.1703	2.926	4.15282	1.19112	5.54391	2.93123	3.47508	5.8451	6.4417	12.0449	15.0323	4.45713	3.89339
ARHGDIB	8.87316	9.30116	21.8949	19.3812	18.0687	7.27787	5.62374	9.14843	4.74415	20.0928	7.46815	65.2033	19.4324	12.0331	14.9535	56.5355	28.6483	16.1386	63.6372	20.8821	17.3054	33.1468	29.9956	51.4008	22.4135	64.7534	87.2273	63.1091	12.0328	31.933	39.609	44.8854	14.3956	5.25739	27.3543	15.1953	24.3591	17.944	26.7816	10.0765	28.5534	20.2493	175.011	21.756	24.3232	14.1107	14.0723	22.3641	48.9582
ANXA2	14.6187	252.706	110.385	180.508	25.391	15.8234	43.3225	10.4678	96.1312	39.5381	12.2098	81.0678	73.8824	93.4013	176.875	155.915	108.006	118.391	116.748	96.7274	83.0981	81.2601	156.91	222.4	52.8131	110.599	180.219	85.5046	97.035	114.699	111.066	212.156	94.5674	112.479	16.6216	43.9997	158.9	31.7487	125.787	30.2144	75.4316	444.133	58.8606	131.083	79.0571	148.876	119.804	122.361	224.409
MMP3	0.286387	0.0181836	0.588894	0.0315499	0.375804	0.211728	2.2547	0.146061	1.43822	0.53024	0.411599	2.23175	0.153029	37.0281	2.35339	6.95814	68.2713	2.01959	0.147869	12.5774	5.52125	1.05137	26.256	6.75314	25.5891	1.29044	24.2164	43.7351	1.76115	3.99345	9.56406	40.1279	0.325054	11.2903	3.57207	81.3249	4.3292	1.77402	69.0369	7.88408	3.44173	1.69536	3.01467	40.3069	3.08519	12.6208	4.50532	14.298	6.03841
BRCA2	0.175228	0.452112	1.28143	0.300091	0.332638	0.211987	1.19394	0.226324	2.01252	0.263074	0.466531	1.64765	2.83545	2.49656	1.69657	4.92666	5.37674	4.01012	3.20981	1.54412	2.87363	0.540951	3.18089	0.747209	2.01624	1.37837	1.46566	2.66409	2.39319	4.00376	1.35759	0.799264	1.89748	2.09256	1.35812	2.63921	0.864239	2.93654	2.51511	3.06749	1.95614	3.15648	1.92614	0.71293	1.05188	2.18914	2.36025	4.31267	3.93794
MMP8	0.0113733	0	0.126288	0	0.00486662	0	0	0.00621486	0	0	0.0878974	0.00895249	0.00675251	0.0514961	0	0.0202851	0.189103	0.100544	0.0440425	0.212481	0.0143875	0.156575	0.06222	0.0347543	0.0267426	0.460444	0.0497114	0.126395	0.00326826	0.00776143	0.0195614	0.0550107	0.0316854	0	0.00432492	0.0792878	0.00527379	0.649346	0.0788137	0.00979459	0.491606	0	0.00602626	0.536181	0.0132218	0	0.0677187	0.0478317	0.042273
IL10	0.0395363	0.0470678	0.39836	0.0326664	0.304515	0.131533	0.0518776	0.0324065	0.0315492	1.32349	0.0884494	0.202287	0.088025	0.220782	0.01753	0.299693	0.220834	0.409776	0.797408	0.181983	0.685197	0.508005	0.256846	0.120814	0.272251	0.413718	0.442822	0.479324	0.153377	0.107922	0.374001	0.248599	0.146862	0.0174866	0.398413	0.455378	0.128331	0.280316	0.624663	0.842696	1.22345	0.0623731	0.984589	0.114897	0.270028	0.105477	0.111508	0.238326	0.293902
SESN1	8.54413	2.74156	5.88465	4.87351	11.7718	10.5809	7.69453	7.23488	17.6526	10.4872	9.52239	2.96307	3.75812	2.17573	5.52854	1.04182	4.28671	2.24381	2.65867	3.52077	4.61898	3.67209	3.46182	5.22938	4.83725	4.31197	4.19259	4.82393	3.96484	3.10555	3.65743	2.82157	3.361	7.03793	7.21242	11.5625	3.29274	8.66752	3.64245	4.16237	5.37442	1.76558	14.682	1.18838	4.8377	1.85823	2.00038	2.19218	1.94533
OAS2	3.34584	8.7809	21.31	6.58366	5.41154	3.17046	4.72443	3.06651	3.82157	4.79992	3.46839	25.3565	5.01994	20.1294	36.2741	64.9826	11.2741	5.51646	58.0328	19.7106	34.7592	15.6404	15.5892	10.0739	10.3037	60.9964	56.3144	40.9086	5.49077	23.8531	20.67	37.93	18.9925	13.3379	5.43823	2.37452	33.4289	17.1675	17.8962	2.11536	59.6329	44.442	98.9211	23.0468	31.0809	19.4807	4.69092	24.7106	13.0076
KLF5	21.7805	226.353	114.928	187.254	35.3109	9.47212	52.7487	17.5961	130.134	3.74583	15.1449	224.693	112.411	123.971	161.717	42.9883	53.0933	155.081	96.0739	49.7238	31.1626	85.818	147.195	72.3073	70.8476	102.06	139.68	34.7891	66.6354	266.759	73.7433	173.318	248.311	72.1357	53.9458	54.5889	178.598	28.3128	98.9103	36.645	116.52	142.669	20.5373	56.4487	201.215	140.86	212.619	64.525	26.7605
F10	1.24474	0.758711	1.56985	0.603359	3.18153	8.96686	1.86412	1.65964	0.333741	5.39937	1.99148	0.222087	0.630632	0.480933	2.70802	0.0444018	0.681249	0.430038	0.487375	0.125823	0.323323	0.792072	0.232662	0.0316971	0.206271	0.723151	0.503256	0.570096	1.32107	0.237844	1.32021	0.214065	0.457234	0.800117	27.5798	4.11996	0.969671	1.07142	0.409432	0.593151	0.448361	0.149617	1.38063	0.198285	0.294233	0.14267	0.140427	0.311767	1.02064
ABL1	14.5322	17.816	13.5671	12.7895	29.3546	89.5511	25.6992	16.8761	35.2869	127.345	20.0432	21.2768	32.9177	29.7216	15.1548	27.2176	17.2657	26.0994	21.9592	32.4732	30.6007	11.3533	20.5549	21.592	10.9788	16.9914	18.2726	28.2015	15.3218	23.3653	17.8391	13.4884	26.1344	15.7125	23.102	23.9057	13.6418	18.7156	17.8292	19.5277	15.234	18.2651	25.6568	17.1364	11.0998	13.7534	12.2262	33.8882	16.5932
SNCG	0.533059	11.5274	2.46305	21.2704	2.96523	30.1134	1.94201	0.976665	4.74413	7.18439	1.78562	2.30778	4.89621	1.1642	2.48866	0.950751	0.993842	12.5696	6.68855	2.84417	30.8606	1.03603	0.975643	8.52782	1.4114	4.83037	7.28105	9.14481	0.774915	2.13984	2.35949	3.59952	10.4052	0.887597	0.989683	0.275623	1.46853	3.76773	3.26805	1.06665	1.84823	0.720824	6.6458	5.31566	12.64	0.9109	1.00229	1.43302	0.370833
CHEK2	0.41065	0.800185	2.23624	0.795588	0.735181	0.452254	1.5013	0.376574	1.68139	0.929319	0.587503	4.56999	4.86498	3.89251	2.89651	1.72864	3.46542	2.58422	5.26418	2.00138	4.85805	3.15375	4.31556	3.49052	4.1604	2.57164	2.96571	3.08697	2.08069	6.20066	1.82662	1.70467	2.48681	4.32565	1.89184	7.03039	3.44503	2.23694	2.18234	11.333	6.76992	1.83823	1.88075	1.85945	3.33078	5.35043	4.39908	1.49015	2.23925
CDK2	1.73215	3.4285	6.07467	2.61759	2.41046	3.00215	5.01738	1.25654	2.28848	4.85538	2.14842	11.1567	9.67893	5.4862	4.11836	15.3605	6.79833	8.29539	5.97857	6.04939	20.2074	3.35922	14.8768	11.9478	9.91659	5.58799	8.83012	8.62656	5.23147	9.00081	5.51799	5.00582	4.74331	13.8256	6.27755	9.55693	6.46748	9.03799	9.4078	11.5792	15.3985	11.6639	4.39478	9.07227	5.73169	11.299	10.9413	10.5041	12.0417
HIP1R	24.8307	7.53768	15.0165	8.71592	26.2021	13.6643	24.603	22.2602	4.66758	3.12909	28.278	4.63284	4.77247	8.24807	7.69213	5.00647	8.58641	5.01156	6.86343	10.7019	15.643	16.6549	16.8333	10.2354	7.0573	8.59471	12.9032	4.99505	14.9843	11.1646	27.1892	12.3013	3.94372	12.2243	13.6925	11.6766	13.4287	5.32736	6.59128	8.89734	6.94743	18.4041	14.9976	38.1872	8.03267	8.80158	9.76383	6.77972	10.111
JUP	42.8873	770.237	2173.93	829.339	49.2667	16.7201	79.9731	30.2601	230.898	9.65658	32.1186	338.958	303.668	564.698	426.557	538.458	228.88	279.193	322.997	312.928	250.692	203.373	194.177	730.394	204.267	387.353	480.193	237.527	241.068	737.427	216.062	658.999	433.282	294.793	105.019	128.048	941.899	94.6803	615.426	145.914	254.417	3185.84	73.3482	284.161	832.773	620.149	856.004	308.473	242.627
PIK3R1	4.54858	14.3001	5.90538	2.89705	6.82186	11.0896	5.03777	4.03242	13.458	21.6852	6.78026	2.8286	2.5658	2.8929	2.70677	2.40737	5.13438	4.28541	5.57136	5.73555	9.17801	1.82485	5.14566	4.55824	3.16558	6.61109	5.02092	14.2798	3.48348	3.4882	4.93601	1.41811	7.78706	1.93711	3.03955	8.29968	2.2582	25.8242	4.41611	2.37846	9.29359	7.49061	14.0354	1.88094	4.01814	2.63851	3.22982	5.32318	1.96337
PTRH2	1.40237	3.56295	2.83957	1.4177	1.80022	1.69423	2.30773	1.37486	4.28931	1.67324	1.53344	6.92845	4.78261	3.97414	2.57132	6.52038	4.51126	6.34961	3.51659	4.23708	2.60261	8.3017	4.31548	5.06048	4.42802	3.31137	4.71889	3.48927	4.88327	4.82447	3.87693	2.35943	3.02851	5.47652	4.0341	4.54319	3.3432	3.61085	4.10901	6.31916	4.95146	4.06413	3.43993	4.30188	4.68232	4.18636	2.40676	2.6043	7.97194
S100A7	9.04585	36.3369	3.45016	33.7537	0.437015	0.0323596	3.82887	0	0.0232852	0.343695	16.6763	10.451	3.05348	451.021	4276.17	1.38787	47.3994	943.654	9.65197	2.68628	17.9769	79.4735	3.39227	36.754	16.7121	1120.25	7627.85	626.59	0.125779	1115.72	247.679	6798.02	14.633	5471.89	0.554817	150.956	1687.77	183.206	210.561	3.86369	284.868	0.29594	8.77434	14.2984	11763.1	766.437	2238.01	160.457	27.7063
IGFBP3	13.7338	1.80864	3.04658	4.60823	28.5983	12.1652	8.63833	9.07301	3.31476	36.7554	12.7315	70.4893	36.839	45.1872	22.3172	106.368	16.5343	69.8308	39.5605	84.7131	13.1046	11.3722	12.1177	14.5436	56.7444	28.976	57.9865	14.2945	8.06523	89.6397	18.2181	45.1019	96.7566	8.68686	92.796	35.1846	15.7355	37.4914	62.4865	42.4624	20.1473	15.963	37.6292	28.4284	12.0628	122.442	126.138	13.6828	17.8427
PITPNC1	5.5084	4.6056	11.0811	1.65895	4.79753	3.9796	5.30983	3.68363	2.70879	7.01239	6.28951	1.46827	0.777895	1.27705	1.9468	2.8527	3.34801	1.97111	2.14795	1.40412	1.77512	4.28679	4.75346	2.29412	2.14344	3.30278	2.91258	3.24361	1.22293	2.10051	2.25779	4.449	0.93809	6.52489	2.83538	1.13683	2.96584	1.51342	2.07925	3.15678	2.72654	3.65391	4.21308	1.91836	3.69891	1.43791	2.61714	2.81401	21.4819
ROR1	6.2539	0.476939	1.67632	2.59082	5.83046	6.23017	9.01595	3.21057	6.8956	8.33421	8.41072	0.304807	0.496109	0.195104	0.436334	0.903561	0.992388	0.546724	0.759158	0.52502	1.28909	1.02076	0.121451	0.538262	0.22885	2.23355	0.408817	1.23543	3.44701	0.19074	7.73425	0.85621	0.892242	13.5907	1.80466	1.17371	1.11785	2.53363	0.372849	0.438787	0.752229	1.34122	3.01441	4.16102	1.73466	0.112196	0.107663	1.0661	1.40288
CCDC178	0.0480576	0.0124827	0.0934299	0.054146	0.123383	0.050387	0.0596192	0.0811695	0.0697255	0.253499	0.138612	0.0103169	0.254199	0.0870381	0.0232454	0	0.0295103	0.0372905	0.521646	0.0118292	0.00663208	0.0120292	0.00597521	0.0300382	0.0088052	0.0329762	0.00477396	0.0500241	0.0025109	0.0149071	0.165313	0.0309928	0.0135239	0	0.109649	0.0105938	0.0162067	0.0847756	0.02422	0.00752487	0.484982	0	0.0740765	0	0.0152368	0	0.00547643	0.0318479	0
ADAMTSL1	1.41153	0.419841	0.372352	0.432904	2.71448	3.11026	1.24801	1.16469	0.0615894	7.38375	1.97904	0.245351	0.518163	0.194445	0.117143	0.121776	0.175064	0.450652	0.660989	0.388215	0.187763	0.0803724	0.104545	0.266465	0.434756	0.163974	0.0551441	0.676799	0.0716555	0.165102	0.43526	0.0689195	0.26924	0.0196943	1.26317	0.176355	0.0757077	0.44642	0.15058	0.287603	0.435974	0.0361275	1.37629	0.0354662	0.106118	0.145192	0.10326	0.818148	0.0651986
TWIST1	0.163484	1.36468	0.174017	1.08061	0.312737	1.51863	0.0908533	0.0420397	0.233287	1.82661	0.962268	2.33149	0.159868	1.44561	0.358171	7.71844	0.884422	4.50285	6.75908	9.24875	2.94401	1.46513	1.13112	7.57436	3.77946	9.52203	23.6805	5.00038	0.326089	1.02378	1.34802	0.91788	1.91113	0.178642	1.60174	2.98481	0.633213	9.38055	6.856	2.79925	24.1282	0.260082	4.11716	0.912944	0.654012	1.60206	1.0367	7.78682	0.838357
MYBBP1A	4.15724	17.4974	8.6405	9.28901	6.91861	5.41063	7.18942	5.0153	5.53319	8.28591	6.1486	15.9302	22.985	24.8864	5.72969	28.6266	22.7716	16.9581	10.5738	25.1647	14.2914	8.84301	18.3785	11.2662	10.4432	13.5732	11.1553	14.4015	13.4788	22.4423	10.5491	13.2101	17.8367	10.0091	8.73256	17.6392	18.7831	13.6432	20.7421	14.2312	14.5587	11.229	13.4336	11.1563	11.9193	19.7975	8.79654	21.334	22.5245
ERBB4	0.46989	0.00142978	0.167932	0.00496155	0.651374	0.348946	1.32217	0.557834	0	0.110933	0.532481	0.00472682	0.0721963	0.0299083	0.00266255	0	0.00468019	0.00915277	0.0620106	0.00243887	0.0288665	0.00275566	0	0.0217905	0.0191626	0.0772593	0.00328088	0.0576351	0.00345121	0.0481509	0.0193654	0.00387267	0.0975891	0.0464792	0.0650801	0.00182014	0.0403753	0.0201675	0.0124838	2.44609	0.318554	0	0.0143181	0.000969512	0.188486	0.00267006	0.00470457	0.00252546	0.00202906
BID	2.03598	5.25599	5.65683	1.27165	2.21279	1.55658	3.14812	1.68684	7.39138	2.44685	2.19648	8.24849	11.6807	12.4188	6.38349	4.53067	6.43866	21.6275	12.8963	9.36076	12.968	6.76008	9.82116	11.1598	4.2068	7.35639	11.2872	3.34089	3.77322	10.8482	9.08343	3.79728	6.71075	8.67825	5.50484	8.9355	6.17427	4.60446	4.37341	6.38106	9.11494	8.73315	6.03933	9.93662	6.00158	16.9846	16.677	3.46694	7.94042
TGFB2	0.201162	0.187972	0.390233	0.25088	1.06865	1.06405	0.613571	0.240588	0.305298	1.62444	0.654595	0.337603	0.59942	0.68054	0.282726	3.53147	1.84984	2.21223	0.823085	5.81664	1.68242	0.292614	0.37116	8.58851	22.6378	2.69817	8.32183	0.968882	0.922722	0.582785	1.91272	1.01337	0.751938	4.69037	1.70312	1.72566	0.404795	2.01404	3.99998	0.405315	0.749454	0.260045	1.33939	0.338261	0.955286	1.38612	0.290221	4.0417	2.90613
RAP1A	9.3972	9.3807	17.6853	8.21402	11.2027	30.6073	11.1517	7.18402	5.43725	24.5305	8.6683	7.00198	5.10086	6.3559	17.5566	13.0059	9.03639	6.70319	14.6688	8.17573	11.1214	14.6869	10.2326	8.49918	14.134	14.1089	12.8868	14.7225	8.45157	4.7343	12.7314	7.50307	8.08892	11.3763	9.25958	8.66819	8.37737	8.38755	6.85142	9.49282	12.0646	5.21864	17.7146	9.22297	10.6986	5.23385	8.60759	12.4117	14.3658
MMP13	0.158668	0.0197107	0.397195	0.0398994	0.0177115	0.0122405	1.26728	0	0.0308278	0.00342125	0.039285	1.62908	0.12697	3.83573	0.0978811	0.779268	0.254497	2.84743	1.96352	417.866	1.02629	4.17246	0.235877	28.0057	1.25597	18.3667	2.92108	2.50445	0.114979	1.2711	0.166113	0.894248	1.04638	0.103741	0.288567	0.535297	0.422253	0.257431	144.9	5.57863	21.7408	0.0870671	0.0804167	0.423241	0.773917	6.15119	1.2193	5.73296	0.0372964
PTPN12	4.95905	11.2721	8.44767	10.6089	7.43519	10.9315	9.26059	4.52987	8.58832	18.2852	7.05925	11.0225	11.4674	12.0476	15.3462	64.9481	16.7347	23.792	18.0413	26.505	30.638	22.7957	18.0912	21.3655	12.3862	32.6446	34.4773	31.1576	7.08166	12.9739	20.7261	14.0336	17.6048	21.2351	9.82695	23.6181	12.8524	25.1078	23.3651	33.3672	24.7391	13.2464	15.7619	10.0152	13.3903	29.097	20.0735	18.7124	44.2337
ITGB4	20.5801	186.06	138.757	23.8206	30.5105	18.04	71.8828	12.3725	141.685	20.2879	21.7812	31.284	61.0526	90.7746	64.7818	499.154	112.878	109.41	64.2294	253.895	118.376	56.9303	179.802	194.632	95.941	122.075	233.982	102.92	67.1118	151.481	121.991	152.549	71.6241	114.908	10.4354	47.4896	111.322	79.8749	379.622	20.6819	122.015	369.778	84.7117	187.328	110.601	157.019	90.8475	247.83	227.205
EZH2	0.622579	2.81236	3.4352	2.77918	1.3061	0.717265	4.30243	0.836334	2.33223	0.683982	1.72695	9.15124	12.7139	10.9102	5.0685	4.45195	4.11322	6.01518	12.0294	2.65029	16.8563	7.46388	8.69227	11.4643	14.2004	4.36695	3.86215	8.01676	2.60407	9.49747	6.95648	5.34228	5.19004	7.34299	4.97171	6.31642	7.19719	9.00252	5.08127	6.25519	15.4431	8.79684	4.41672	4.6405	5.60417	9.79138	8.07237	4.26932	14.2641
FAS	0.805778	1.59038	6.40962	4.70854	1.67859	2.04582	1.44127	0.683641	1.24876	6.12298	2.07004	5.25357	1.00087	1.05932	1.58893	12.821	3.43203	2.66641	7.40053	2.61807	38.3187	1.62017	14.2613	5.08655	3.86055	7.71525	5.83614	11.897	2.06872	3.72256	5.03297	2.38631	9.44218	0.656507	2.01587	2.00851	2.14842	15.3904	5.05775	4.86207	12.5559	5.85902	17.0218	15.9399	6.15969	3.99453	3.77108	3.79009	6.57746
SKP2	1.57955	7.95852	4.89085	4.22678	2.01457	1.5731	3.958	0.94666	5.98834	2.57747	4.02905	14.7195	19.2733	19.2624	13.3429	16.2067	11.7071	11.8762	4.53821	8.7136	10.901	5.20955	11.9514	15.43	12.33	8.55195	15.9961	13.3877	7.40885	29.0622	8.35175	6.23357	9.35942	6.49042	6.77383	13.0256	7.76381	23.406	14.3694	17.4863	10.1862	11.3135	4.54646	5.30112	10.4993	21.4204	13.7896	18.3746	7.18289
CD36	5.18195	0.936984	0.424474	0.501455	4.3553	5.72386	2.61531	3.40937	0.641626	7.0224	5.93423	0.702904	1.09821	0.508756	0.203967	0.403343	0.906871	1.10653	0.762206	0.801753	0.32373	0.45413	0.50491	3.7269	0.324628	3.16981	3.92103	0.544169	0.127748	0.612026	1.25163	0.344037	5.34412	0.336824	2.10358	0.256604	0.421241	0.372172	0.366461	29.8969	0.734828	0.050531	3.67255	0.423154	2.81435	1.89073	0.455494	0.390182	0.177644
VSNL1	0.494761	20.3397	0.906193	10.3715	0.283732	0.330333	0.176689	0.345613	0.156296	0.34655	0.950222	12.0409	3.17974	14.5065	9.56644	36.9444	2.743	30.5377	20.8218	9.61762	3.19782	2.58408	13.9695	34.8862	22.4824	19.0957	21.5975	0.996282	1.27811	39.8551	0.938688	10.8881	13.8912	6.06856	0.558609	8.90509	24.2429	8.57274	11.3276	0.153742	2.41518	1.37946	2.35668	0.118584	31.8184	14.3818	15.4376	16.7434	0.282652
PRDX1	54.426	298.128	141.684	194.649	80.3593	45.2423	80.3516	41.3997	119.15	62.424	55.2593	580.952	152.744	128.265	191.404	137.067	193.356	344.816	376.821	245.66	120.957	110.879	176.668	406.541	661.002	200.207	154.766	167.82	120.764	264.603	142.955	217.533	684.869	174.817	52.3056	109.618	228.786	130.841	143.228	160.979	209.703	130.241	138.562	375.85	243.948	382.113	283.675	143.348	165.396
EHMT2	4.72876	5.72983	10.508	6.54209	5.92452	5.72527	5.79728	4.54361	10.4604	6.35303	6.6181	12.974	18.804	14.8973	8.07753	4.57186	13.3707	10.7635	14.5674	14.7775	14.8386	14.5389	12.8284	17.4683	12.938	11.3448	12.707	10.2396	23.2556	10.3309	13.4177	12.9198	9.04011	11.0922	16.5582	8.51854	12.7956	16.645	14.2139	28.1508	17.1351	10.8472	10.3833	13.7952	11.8023	10.7479	12.2283	11.5662	15.4545
BCL2L2	10.1651	14.704	5.93862	13.9478	13.3923	21.4025	10.646	13.3025	6.35812	19.637	12.2941	8.76557	9.04165	9.54319	9.21284	13.7211	6.6518	19.0162	11.7175	12.4675	9.03558	7.21765	8.77685	4.28567	9.23392	7.07114	10.2329	12.1685	5.36733	12.4342	6.53015	12.777	14.5656	5.33814	8.33081	5.47464	9.30154	6.17225	7.7388	9.94378	7.12953	4.27473	4.96071	4.40055	7.37897	10.484	10.6301	9.62307	9.25078
BAG1	8.82394	15.1841	7.91823	7.74735	8.34924	6.57686	11.823	7.6331	16.4445	5.31838	7.51844	18.6685	4.68384	3.78822	16.04	5.80025	5.38208	10.2683	9.90998	4.43884	2.81898	9.79446	14.9829	8.29549	15.1258	7.59068	17.2125	3.62632	9.37462	18.8926	11.7478	9.7445	20.2003	6.44096	8.57848	9.12639	9.36146	3.60778	3.593	3.50473	5.2351	11.8466	5.95614	7.38556	7.08701	11.3201	4.88073	3.23185	6.15642
ITGA8	2.10622	2.04553	0.719873	0.924839	6.41875	37.952	4.52002	1.44469	0.562037	142.635	3.05504	0.243269	1.01304	0.302598	0.336242	0.31498	1.70161	0.684018	1.35937	0.381125	0.477033	0.388521	0.285932	0.27181	0.378609	1.03537	0.105001	1.06877	1.01049	0.421808	10.8878	0.569457	1.63357	0.0574331	3.81011	1.59798	0.257711	1.21141	0.725635	1.66177	0.892954	0.451859	4.17228	0.105663	1.21823	0.258667	0.240903	0.876692	0.679216
TP73	0.144542	4.64468	0.568282	1.42117	0.101433	0.0359052	0.406632	0.0473902	0.236219	0.0358414	2.51636	2.51672	7.1777	14.309	2.10723	7.72716	0.237324	4.43793	2.48147	5.3413	8.59974	0.846365	0.427003	0.945211	6.53905	5.88345	8.6711	2.55457	0.122946	10.9608	0.591676	0.978772	4.25952	2.63646	1.61377	0.688712	1.90348	24.9407	5.0338	5.21314	2.88533	2.42886	0.621885	0.0560075	2.99773	3.7996	2.56376	3.39119	2.02589
GRHL2	5.04576	12.103	8.93197	9.90538	6.97971	2.79348	7.17281	4.26628	16.7956	0.054399	5.65329	21.6086	22.7822	15.2133	8.68004	12.0933	9.00507	28.4833	17.401	9.94245	18.9678	8.33809	11.4788	9.95464	9.77496	11.8502	6.23101	20.9625	6.94757	28.7049	6.36454	10.0389	31.8495	6.69511	5.1502	5.67948	9.35288	11.7596	10.5612	20.7099	12.4206	7.51819	2.19491	9.15069	20.328	15.6226	17.2297	12.7414	17.2936
IL17A	0	0	0.268156	0	0	0	0	0.0344809	0.0335687	0	0	0.0248349	0.00624398	0.27301	0.102587	0	0.480869	0.00641186	0.00678762	0.0113901	0	0.0579133	0.186986	0.00803425	0.0141306	0.0144328	0	0.00708343	0.169239	0.236838	0.0994854	0.244166	0	0.074424	0.10398	0.16576	0.117039	0.0313958	0.00583026	0	0.309943	0.00948083	0	0.0882934	0.207844	0.0311747	0.0461402	0.00589727	3.59623
ILK	1.03253	1.78504	1.90162	1.84533	1.8297	3.79355	1.48442	0.950584	2.01686	5.51303	1.1504	1.1087	0.756291	0.863875	0.840983	1.56135	2.3005	1.67641	2.12235	1.5832	2.27445	0.731336	1.89568	1.66333	0.938712	1.23218	0.86766	1.77641	0.919155	0.991834	2.18126	1.20149	0.868531	2.79468	1.3529	2.82688	0.738991	1.9265	3.35669	1.18883	0.683572	1.70482	2.97335	3.08763	1.06987	1.51039	0.984784	2.35371	1.42968
LEF1	0.397506	2.91405	1.55978	2.72691	1.04864	0.449715	0.440238	0.163409	0.430696	1.60241	2.50098	9.2204	12.229	13.8394	1.96624	0.852079	1.79633	9.72293	3.75415	5.63027	1.61651	1.01081	0.820477	3.24289	8.38144	3.39574	1.37482	4.36235	2.08754	7.15002	2.48385	2.04379	3.05475	0.87423	5.08117	2.41413	6.453	21.3574	2.92341	1.24997	1.46527	0.420814	11.2538	0.628825	2.70696	9.81137	3.21595	2.7791	1.146
SMPD1	10.2303	9.87877	9.47301	11.5777	14.5168	11.5358	10.3733	12.8977	6.04073	15.1502	11.0929	6.42435	6.33562	7.77274	7.5401	2.43457	7.89028	7.68926	7.11666	8.43889	12.6988	3.60827	4.81303	6.91385	4.25078	10.0737	13.995	13.4267	14.7461	8.6601	18.9468	6.97362	8.69276	10.1061	13.3605	6.36119	5.95366	19.8334	9.84132	9.53275	5.63614	6.0245	15.0904	9.9768	7.00858	5.0072	7.6462	8.02493	6.25059
GSN	37.8303	60.053	23.8521	85.0644	87.9454	173.928	61.2867	33.0167	20.8988	234.021	37.7003	39.6112	50.7064	30.344	49.185	23.5564	31.5145	67.0744	70.4235	50.4072	32.4483	22.7049	14.4906	10.892	28.7412	41.5669	58.8716	33.5727	13.3987	75.8804	43.419	69.3436	23.9363	26.8138	24.2911	7.50264	36.6772	26.8388	13.178	39.0898	9.34214	21.1732	81.2975	29.687	12.7665	45.4909	28.3872	58.8312	45.1581
PDGFB	4.08064	3.75272	1.46227	1.13389	5.8322	4.05833	3.18127	1.56231	1.18802	12.2893	2.66419	2.94611	10.2619	13.1837	4.30088	4.0702	9.23463	8.46197	7.31727	16.02	5.65268	2.69081	3.89604	3.91163	5.83209	2.56107	13.1214	6.22517	3.61198	8.55641	6.20486	7.82454	3.8265	9.30239	4.72047	8.02936	2.28027	3.67786	24.0313	13.4033	4.56536	1.31214	10.9513	8.59746	1.51683	8.46885	3.44702	10.9776	8.7297
NTF4	0.0286038	0.653813	0.0705811	0.194977	0.0367186	0.0190323	0.015013	0	0.0365204	0.0177319	0.331593	1.22147	1.24822	1.01883	0.323408	1.0501	0.0111467	1.50413	0.992286	0.414346	0.926324	0.0853201	0	1.05435	0.331483	1.02062	1.10959	1.13668	0.0287688	1.13704	0.0614961	0.539571	0.854441	0.0822332	0.0598244	0.0303448	0.901923	3.5117	1.03072	1.17624	1.17316	0.0322327	0.0682021	0.00461812	1.40078	1.28032	0.986019	0.745838	0.0628234
HOXA10	0.010548	1.77812	4.77173	0.348607	0.0496482	0.0233946	0.0166086	0.0288194	7.41377	0.0575419	0.562053	3.64495	2.6647	1.63655	7.76362	1.05667	3.52953	3.28297	1.14711	1.79355	1.61723	0.280745	3.85542	3.57779	3.75573	1.57784	1.80958	2.59668	6.30164	3.01245	4.61712	0.758479	3.05943	2.93914	8.59976	4.30016	0.992893	6.46704	1.47358	6.17701	2.2693	7.72128	0.0894233	2.72478	2.26854	2.29188	2.07586	1.11198	5.89508
EDNRB	2.84643	0.805853	1.6132	0.447815	4.46149	3.11334	3.78611	1.63212	1.48605	7.05818	3.01982	0.727418	4.22956	0.447258	0.525579	1.16837	2.35016	0.677523	1.46214	0.567996	1.71458	1.69629	0.879925	0.598737	0.502954	1.08093	0.419685	1.57576	0.443714	0.641284	3.99033	0.910303	2.3947	0.313877	2.11441	3.59762	0.15911	2.23786	0.642007	4.28814	1.50922	0.727632	11.9706	0.793214	0.566621	0.649581	0.5572	1.06482	0.650862
LDHA	13.1409	199.39	92.468	122.686	23.9548	41.6749	39.75	15.7377	48.5286	141.389	17.8487	193.856	107.057	145.957	141.188	218.377	177.104	78.1342	54.246	227.553	89.2698	130.19	208.87	495.299	212.535	193.98	341.721	188.821	66.2903	117.177	94.1666	134.813	63.9574	154.651	93.4358	199.557	183.923	102.744	328.749	114.323	158.731	180.466	98.1966	285.212	153.692	279.273	173.414	130.742	272.621
SCD	13.4689	49.7761	40.2798	49.024	5.57923	7.02589	13.3922	5.4911	120.745	4.84068	11.4318	177.247	71.7127	106.18	45.1763	42.8843	180.511	198.602	108.831	88.397	71.0636	13.9278	110.36	123.934	245.679	49.3479	74.0589	39.0352	40.3433	81.1636	7.58186	23.7331	64.772	135.79	28.5069	23.8937	53.2036	43.4252	28.5859	117.224	63.6683	129.363	24.0567	22.6193	94.2089	241.458	215.362	107.16	55.8255
SPHK1	0.314334	28.6173	1.05967	7.50614	0.920683	2.20737	1.26408	0.435462	0.226103	1.91457	2.44191	5.35281	5.03362	7.17903	3.12902	17.7115	3.10548	7.10968	6.28623	17.0362	12.0233	5.9771	2.79743	10.4475	12.1499	10.1648	7.90487	10.2816	1.07121	10.4868	2.46713	9.64763	7.05235	2.56516	0.828305	3.24475	13.9598	22.085	13.2167	9.16574	3.57941	0.66652	6.03345	2.99066	3.08808	6.6169	9.38438	21.5834	6.60014
PAK3	1.17926	0.0126397	0.255745	0.0109654	0.916724	1.05798	3.34749	0.505573	0.0181549	1.7498	1.23543	0.0134313	0.0213871	0.0160241	0.00672506	0.414799	0.0758528	0.0786013	0.10768	0.0215603	2.50775	0.0226207	0.0220405	0.00289675	0.0662326	0.214655	0.0621512	0.150682	0.0261511	0.0168197	0.26413	0.0183405	0.210104	0.0117397	1.3208	0.116082	0.0369237	2.5611	0.0420421	0.0538807	0.607177	0.00683664	0.333518	0.0183659	0.0969788	0.00786803	0.0463428	0.0350834	0.00384375
SEMA7A	0.812155	0.548792	1.30243	2.42172	0.900834	0.350196	0.714415	0.327269	1.04273	0.785296	0.494603	1.27858	1.28763	1.38874	0.812744	4.46971	3.06708	1.70676	3.72191	2.00489	4.65829	1.09518	1.88644	1.00518	0.585242	1.55043	3.7779	3.86272	1.75754	1.95066	3.02783	3.48495	0.808983	4.26236	1.14563	4.56029	2.28061	1.67617	6.81145	4.05977	3.01754	0.801688	6.15442	1.60864	0.986353	1.55745	1.55835	4.22849	4.60849
DAPK2	1.11025	0.207923	3.25466	0.318039	1.89292	0.639662	0.915172	0.66712	1.94658	0.153857	1.13806	0.175238	0.375208	0.185558	0.942516	0.624207	0.15448	0.132227	0.294783	0.111222	0.574152	1.46058	1.15014	0.975449	0.133158	0.539096	0.211877	0.9819	0.180777	0.547908	1.36485	0.539092	0.180508	0.876656	2.52115	0.654757	0.363638	1.51143	0.321682	0.252331	0.571444	0.747101	1.10197	1.55088	0.479211	0.407021	1.49793	0.139333	0.213539
SFN	29.3113	1870.18	83.4979	1248.51	26.0098	4.16537	74.4727	12.4963	75.5659	0.734532	28.0744	417.774	94.2938	436.001	737.487	1837.17	58.9339	393.918	487.942	698.509	202.009	141.835	223.423	1273.02	686.98	699.72	641.163	249.087	51.6272	915.881	150.68	1177.97	516.568	537.118	39.8537	51.1513	1404.68	151.87	1994.36	97.6668	610.261	238.016	30.3868	152.391	1046.45	832.066	968.066	518.044	134.505
RBL2	10.4831	7.02067	12.5702	8.69247	16.3657	15.2999	13.2921	10.3798	17.8654	15.1173	14.5664	12.3052	12.4448	11.5723	9.58756	8.66356	11.1645	17.6238	12.794	11.6979	18.1626	6.33905	13.3878	5.06017	7.75326	11.6083	4.35733	15.4383	5.06399	17.7892	13.5193	6.62632	17.0611	9.35355	8.05409	5.7559	9.08299	17.2662	10.7629	20.2825	15.9658	10.7338	13.3876	6.61483	15.5372	13.4434	13.6295	10.9286	16.8925
SMAD4	3.7707	3.61106	2.89926	2.32401	5.78582	6.04285	5.88487	4.07535	7.76261	6.63849	5.09395	3.97076	9.56343	7.90487	1.45985	3.20367	4.61202	3.91478	3.21344	3.34805	7.25435	3.36363	6.9797	4.40001	3.90139	3.37759	0.752108	5.04428	3.06615	4.9858	3.63217	1.9504	7.11492	4.00102	5.17693	3.34882	3.07001	5.06127	3.11121	9.10293	5.85127	1.79163	4.5595	1.80783	3.46129	3.54973	3.72751	6.54373	3.27613
MUC4	0.0449231	7.46111	7.70668	0.584028	0.204779	0.0398543	0.306037	0.135264	11.3595	0.102755	0.163337	9.5201	0.481721	0.695167	17.5079	0.00436048	3.79897	0.347668	1.70708	0.428946	0.399425	5.08812	62.4704	0.0203111	0.438533	2.19803	1.41304	0.324803	0.131199	37.7996	9.62265	26.1239	0.799733	0.649599	0.568965	1.58061	15.7387	0.87376	0.344594	0.120799	0.47824	1.11906	0.203054	35.9732	15.0742	4.05363	5.79148	0.0483247	5.03893
NUMBL	1.30942	6.38255	1.53544	2.55494	3.5888	6.51732	2.74201	1.57049	1.40391	14.1116	2.41727	9.90541	8.94039	11.888	3.44183	4.81663	2.58713	14.7179	8.43813	11.1362	6.91123	2.45594	2.86998	6.42005	6.74202	5.25047	4.08155	5.75073	1.87946	11.7793	5.15392	2.74341	8.62007	2.31362	4.43545	7.82793	5.67635	7.40459	4.57326	7.30091	7.13098	4.30103	6.70328	2.77541	1.8911	14.7556	8.13745	7.52331	5.47504
S100A8	15.9554	1405.05	7.41695	5811.17	5.23897	1.81034	3.24366	4.18413	0.297754	7.78749	46.4971	50.3289	28.0035	495.123	4331.39	19.2375	20.6399	264.318	197.1	31.8455	40.9875	267.636	13.8214	443.957	14.5967	1710.33	2482.77	959.543	4.42302	1169.05	324.913	6300.16	255.083	2317.36	2.7935	13.7839	4619.7	547.691	398.599	2.82847	507.245	8.91755	10.4003	18.9891	8400.66	1465.03	3262.43	98.2967	7.44666
BUB1	0.213917	1.47861	5.74769	1.16224	0.588041	0.12652	2.647	0.152315	3.96441	0.287724	0.999324	7.1589	7.33362	8.5841	8.55363	13.2883	14.3635	12.7002	7.88637	8.45284	10.7145	4.07536	11.9377	7.58668	6.79149	2.65103	8.93567	8.21041	9.36604	13.9192	4.74678	3.54508	2.4922	8.99405	3.96624	17.8072	4.76728	9.98306	11.859	9.13301	12.128	9.13676	3.81255	4.73892	6.19264	9.27336	6.65087	23.3709	16.1911
TNFRSF12A	3.03628	18.9425	16.742	5.61179	4.85284	16.4907	29.9623	3.27206	5.70688	8.12707	5.47373	6.77031	2.55015	12.9334	8.63107	101.409	18.7501	22.7557	15.882	39.5126	27.2963	66.5307	22.2391	35.6258	13.0776	29.473	71.171	30.9678	34.4627	7.91995	44.7984	30.0883	3.74643	17.2381	6.49316	36.2609	15.1585	21.492	48.5267	22.0574	44.8144	28.8025	16.5141	11.1912	3.85569	19.7883	14.6074	32.6696	233.474
TLE5	45.932	37.8692	35.91	44.5702	42.9497	57.0596	42.9165	39.3941	44.4533	47.4634	44.7244	68.003	37.4518	26.7604	32.7698	40.1795	21.4039	54.0592	47.3051	30.8021	44.7587	34.4001	34.4055	36.8796	80.4056	46.1281	44.1423	24.7206	37.6048	49.9654	34.8161	34.6816	41.9751	64.2186	74.1742	19.5383	59.8798	23.5695	27.8837	27.9439	17.7633	46.6104	52.0968	44.4434	36.2482	38.4783	57.6526	36.98	31.3398
LYPD1	0.0648448	0.239312	0.240011	0.0200915	0.027747	0.0791014	0.212715	0.0620094	0.0776173	0.132654	0.158257	0.306255	0.149185	0.4453	0.150946	0.775857	0.277965	0.835167	0.381894	1.18951	1.48885	0.148785	0.0942297	0.210536	0.332172	0.294781	0.168286	1.22291	0.125779	0.304231	0.334588	0.21955	0.115418	0.100381	0.351384	0.343958	0.593853	0.92556	0.993076	0.279219	0.326473	0.116915	0.747301	0.183212	0.310959	0.201829	0.22353	0.722687	8.20013
PRKAA2	1.14119	0.786285	0.302567	2.2968	2.24839	7.04805	2.52969	1.58297	0.0066714	5.99121	2.27163	0.740347	0.871125	0.734369	1.74039	0.0285801	2.27407	1.81968	1.59447	0.164115	0.24325	0.0306923	0.0128636	0.697764	2.10763	0.491923	0.369989	0.665866	0.79401	0.300956	0.298371	0.179273	2.48314	3.99724	1.74061	4.22555	1.27349	1.71588	0.163376	4.18313	0.685788	0.0150736	0.279079	0.00404938	0.858933	1.43862	0.0864585	0.86143	0.0155372
DUSP19	9.51715	0.211276	2.16862	0.327518	5.75454	3.63285	10.0247	3.71612	1.85263	1.91896	8.76599	0.526718	0.937069	0.663035	0.751407	0.348096	0.799291	0.718372	1.04213	0.667602	1.03787	0.443914	0.604315	0.391728	0.723175	0.803521	0.923922	2.05997	0.875743	1.10934	1.23221	0.412776	0.553859	1.83366	1.9831	0.593031	0.573348	1.96775	1.00401	6.61763	3.01168	0.462259	0.736084	0.237206	1.22604	0.717953	0.638204	0.805505	0.376018
KRT14	18.5822	3357.43	12.9647	142.946	0.799529	0	39.8849	0.00936724	0.0601883	0.00425069	9.97799	58.0625	3.17541	358.692	872.758	3681.16	0.133604	181.089	61.3927	1603.42	37.7542	168.154	2.20969	3116.07	1322.94	1898.24	1336.57	1142.18	0.581271	1120.27	90.7359	833.119	19.8936	1676.22	0	2.05757	2347.16	99.3044	4655.34	0.199297	1592.58	19.3557	1.46236	22.2462	1365.13	1122.25	1021.07	663.602	0.202731
UBE2S	1.75311	8.96273	8.27107	5.59696	1.63234	1.63618	5.12333	1.35649	3.07992	2.11096	3.30304	35.2773	31.0007	27.2042	14.657	34.6784	20.3422	21.0561	15.5555	12.5162	20.5876	17.641	18.6397	36.707	41.4667	20.2096	14.7698	8.17575	16.9834	22.0849	10.4689	13.0335	21.2295	26.5741	14.0158	35.8062	22.1308	23.2213	14.069	8.03195	33.3972	30.597	11.0577	16.4663	9.56252	37.911	26.2387	18.5797	25.8558
BST2	8.49119	79.6385	121.647	7.83859	12.2458	33.248	5.39204	10.5019	33.695	48.3664	17.7668	68.0761	16.6697	33.2042	97.3145	150.252	167.418	16.1592	91.3945	35.1863	57.5271	17.0455	176.277	8.28869	386.72	136.898	177.59	293.664	45.7685	12.1257	66.7113	71.2112	21.5792	14.4969	23.0544	13.2499	116.662	174.155	24.4277	3.14469	307.247	114.664	361.561	103.027	81.6208	14.2528	41.7978	67.3751	12.1968
ELK1	3.27379	6.16467	7.22639	4.5732	5.24396	5.28816	6.03966	3.43326	12.3743	9.3477	4.47937	14.0759	16.5266	20.7888	8.03083	17.5617	16.5709	8.44338	13.1232	7.81415	16.6123	7.12881	14.4043	13.4192	10.0615	8.01444	12.6873	12.6566	10.6741	11.0921	9.30704	6.69754	12.4743	21.8494	19.3937	11.231	8.32396	8.04275	6.95026	21.4797	18.5788	16.769	9.96282	14.8071	14.5446	13.9717	8.5176	6.70106	16.0468
IFI6	32.3434	44.1499	210.128	7.82467	20.5613	35.0104	19.7873	27.9372	90.8722	39.5119	57.6986	457.321	32.7293	141.567	270.801	265.228	40.563	81.4257	288.322	106.434	177.111	525.982	59.2123	216.041	506.7	1760.35	109.83	367.519	255.732	115.712	293.46	254.049	57.6227	56.2813	226.921	38.3779	395.64	245.722	188.664	68.4571	475.913	399.402	1845.24	157.292	135.647	197.056	60.8143	88.5153	122.133
ID4	6.8978	6.91102	0.274415	18.1865	9.29365	6.99266	9.76232	9.32513	2.87528	18.6388	9.47232	3.79481	7.86878	3.81681	10.2292	3.11908	1.6165	1.65268	8.71538	6.59436	2.21576	3.31464	1.25482	9.15638	4.94222	9.50632	0.925081	5.06725	0.378697	2.48738	9.99171	4.1311	13.844	47.633	13.6702	2.18429	13.9079	18.4444	4.07367	40.1528	2.86781	6.22585	6.67333	0.867226	4.17914	1.973	9.16923	6.53385	2.23774
UBE2C	1.35304	6.42869	38.0761	6.10469	2.94036	0.56647	14.4744	0.747668	11.685	0.987676	8.60789	101.921	32.7015	24.4135	43.2891	60.4127	71.8985	27.5468	51.5815	15.8313	51.7105	77.7458	39.9215	67.0014	103.421	44.6064	76.5496	43.3032	34.0583	58.2229	35.6917	21.4912	23.9536	75.2556	24.3039	73.7098	47.147	79.2076	43.6067	53.7838	77.1532	74.7892	22.4582	22.5127	32.6786	45.5608	50.2337	59.8533	124.9
TFDP1	8.92612	22.0743	27.6695	17.993	10.7786	11.4287	19.826	6.65388	28.2312	12.4898	11.1814	40.0633	47.2556	52.736	31.1291	38.4339	44.2667	35.6315	32.5793	22.9345	49.4537	19.7134	37.0709	36.2233	32.8062	30.2768	37.9785	27.1247	21.7907	57.3619	14.0356	23.0868	38.4987	25.1301	33.5061	26.1747	42.1077	35.1694	33.8684	47.5268	36.1739	49.3176	24.523	18.0597	25.2618	30.4934	58.3721	31.2978	30.1469
S1PR1	10.3388	2.80725	2.45059	3.72936	12.9177	21.2531	13.1784	7.57679	1.89794	47.453	9.27565	2.82631	5.58267	2.79411	2.72675	2.84245	6.74468	2.06488	6.34402	2.39598	4.01706	2.63514	3.29994	4.20202	3.36166	4.8227	2.66087	8.06123	2.94902	2.05059	9.8546	3.97427	6.52291	0.360415	6.92374	5.71943	1.15129	5.32618	4.50338	4.43538	3.67112	1.48643	25.886	3.34664	2.63474	1.26815	1.91125	6.49356	3.33855
IFNG	0.0963089	0	1.14862	0	0.109895	0.0142404	0.0168496	0.0877122	0.0922231	0	0.0522326	2.24902	0.0571801	0.106594	0	2.14718	0.358629	0.0293588	1.01526	0.104306	0.243666	0.220979	1.24036	0.0735747	0.873472	1.3217	0.727901	1.1568	0.221404	0	0.28988	0.144925	0.0993747	0	0.292987	0.116767	0.26795	0.131776	0.507218	0	4.09984	0.043411	3.98036	0.114028	0.279905	0.047581	0	0.720067	0.455595
FGF2	0.606	0.623874	0.367899	0.212202	2.11396	6.33116	1.82054	0.605521	0.160271	10.1566	1.28882	0.699619	1.80752	0.496506	0.138186	0.423761	0.548777	0.784674	1.81776	0.618819	5.01724	0.12183	0.250617	0.337292	1.24268	0.67324	0.498218	1.68124	0.344966	0.389918	1.26811	0.485728	1.34884	0.0536058	0.84057	0.699738	0.390726	6.13368	0.404742	0.377743	1.18497	0.0806451	1.45869	0.0931805	0.36902	0.778418	0.0958578	1.28644	0.0975073
CLU	24.4354	58.5901	56.6714	51.2954	59.2099	109.957	21.0997	36.7942	74.938	154.287	34.2328	122.031	47.4671	10.3257	5.32223	1.70416	4.71068	22.2665	46.0938	16.4535	18.2022	10.778	8.23471	13.9627	35.4507	125.754	2.60908	52.4614	18.1129	19.9987	74.4033	84.8726	773.071	26.3335	24.659	52.1651	69.8504	25.0648	36.8763	46.5025	12.3987	23.6987	35.1578	44.7061	30.0336	21.7274	11.5034	49.7677	5.6196
CXCL12	2.46435	2.72391	1.63797	2.35778	13.1935	18.1297	2.75573	3.22768	1.58347	59.145	5.76834	2.09682	1.65986	2.15587	0.844464	1.62961	5.63499	2.36746	4.9937	1.5662	2.10652	0.673212	1.47181	2.05467	1.45242	5.15464	0.532592	18.9017	0.462245	1.1175	5.9262	2.05818	1.79855	1.63637	4.00783	2.60751	0.704128	4.3531	1.27165	3.80957	0.616291	0.377033	32.1803	0.818599	1.40065	0.762925	0.48998	2.86659	2.10674
TFAP2C	0.188676	6.63629	1.18264	15.9493	0.484404	0.115439	0.218545	0.199091	2.71215	0.267805	13.9941	12.7519	17.4326	17.3332	9.08111	20.0828	6.73393	13.0025	22.2592	6.35579	5.62296	1.03302	6.11751	16.8095	10.2016	12.4644	19.9629	20.2714	1.45828	22.901	0.626642	9.18465	18.9513	2.34811	0.68284	6.29467	25.3778	143.901	12.3028	10.3823	26.6202	2.90913	0.103419	0.558819	30.9196	19.0505	27.1494	20.1348	14.3818
ALDH1A1	515.874	10.2021	47.9882	9.55379	330.653	125.9	570.07	220.941	18.9776	20.3513	342.046	81.322	40.6448	18.8623	52.9244	0.938357	55.5875	72.476	62.7986	3.32218	4.82315	40.9444	44.5338	1.02227	88.2528	14.3005	16.8756	3.75769	23.6005	116.888	123.616	25.6019	528.797	34.7281	85.6603	90.8708	64.8883	126.409	0.783686	0.910103	8.58176	91.2855	96.7774	211.366	30.1954	87.4981	48.4851	1.19674	1.60921
CXCL1	0.286623	2.29877	22.8803	2.70472	1.70413	0.468416	0.158355	0.857305	12.4616	2.28929	1.4604	4.45293	1.20912	20.7553	96.8528	60.9331	95.9793	3.46737	0.486813	5.27722	10.4348	12.9453	234.173	13.8408	14.8573	7.68067	23.2344	5.82201	71.1023	39.861	101.449	101.617	2.19476	81.6941	17.4505	90.9553	55.4572	13.2289	67.732	3.46871	195.9	25.8253	15.187	175.195	49.385	48.3126	52.5597	119.722	173.798
TNFRSF10B	3.29004	8.07181	14.6497	2.44903	6.25077	5.91161	8.16454	3.36366	12.2558	9.41385	5.54417	11.1139	5.78578	8.2721	11.3878	26.0411	21.8962	4.53169	13.0781	11.09	36.6945	9.7475	36.6509	17.95	10.0685	7.06917	12.1086	10.8424	23.5857	7.91771	19.2643	8.59956	7.12198	14.2465	1.90836	49.2133	7.05497	14.4695	13.4462	10.9189	30.6599	23.7413	12.1747	23.3818	5.77682	13.0469	9.54292	40.851	21.5013
IKBKE	1.55746	4.35663	9.03083	7.12018	3.39395	0.63596	2.5985	1.55558	5.38939	0.491057	1.35092	8.05393	5.60935	7.36319	6.93305	1.85496	14.3787	6.59338	3.81774	4.47949	23.3373	3.1239	6.83817	6.4888	2.61926	9.26438	9.56312	4.44957	4.35402	7.52791	3.48147	10.4034	10.7437	6.24528	4.33796	8.20967	8.53238	3.13685	4.04834	2.86463	3.04482	7.84773	15.5209	9.40868	7.11646	11.2942	10.3142	3.33431	5.92477
HIF1A	13.9941	25.5208	27.0166	44.8825	23.3025	23.3048	32.2722	13.6098	36.3256	85.5626	14.6728	51.3964	53.0081	83.821	40.753	76.2933	66.3577	58.3348	49.0789	77.0222	89.8749	22.4093	53.2238	139.93	77.4908	55.802	46.6836	103.918	28.5237	97.8017	52.8251	33.341	37.9329	27.0947	32.7432	46.48	51.8666	24.5594	106.99	36.0468	94.3716	26.155	42.0519	33.9854	61.3611	122.473	85.9174	78.6971	56.8786
KIF18A	0.205224	0.618274	1.98081	0.512152	0.290327	0.122617	0.993604	0.0915453	1.48123	0.139164	0.770027	6.50124	2.99141	3.85592	2.57384	6.69316	5.08789	3.93236	4.51422	4.24573	5.79626	3.64789	3.76054	4.99455	4.61449	3.71306	4.75964	3.86749	1.88475	4.68738	2.35195	1.2992	2.48922	8.60267	2.27751	5.17691	2.70338	7.1518	5.30546	4.43285	4.135	2.90727	1.54899	2.15842	2.99684	5.1175	3.11326	4.07003	9.06856
TDGF1	0.6435	0.00371435	0.356066	0.0451127	0.760975	0.328696	0.393015	0.613765	0.107057	0.0831678	0.383898	0.0245591	0.0115775	0.00941783	0.44614	0	0.103347	0.00237775	0.00503419	0.0232312	0.031575	0.0107382	0.0133349	0.00297939	0.0157204	0.0187327	0	0.0709233	2.93178	0.00266146	0.164341	0.0150909	0.0265594	5.05063	1.57204	1.25067	0.00361686	0.136801	0.00648621	0	0.635991	0.0914116	0.0165316	0	0.0113347	0.00462427	0.0464426	0.0131215	0.00790679
S100A10	33.7544	791.442	278.677	662.432	47.6569	53.5518	107.269	24.5654	183.185	94.5578	41.4164	83.9981	81.8322	161.049	549.093	280.084	206.643	236.632	193.493	267.532	70.6092	615.241	486.346	432.883	149.918	308.682	815.508	108.332	135.33	153.298	265.729	769.14	156.079	417.898	164.495	177.239	464.563	101.155	493.336	195.649	124.05	1340.68	218.274	141.414	176.222	225.798	358.64	290.147	421.319
ACTB	424.063	2060.47	1332.62	1662.76	766.434	1539.79	981.5	374.665	1442.37	2435.94	474.214	1585.18	1550.08	2000.81	1913.7	2257.34	1930.94	1474.41	1742.94	1794.72	1571.37	1730.82	2387.4	2435.74	1801.6	2059.88	3470.13	2727.58	1760.37	1386.99	2152.82	2777.67	1013.15	1614.57	1181.48	1227.36	2662.2	1541.16	2643.44	1435.32	1901.49	2385.57	2233.04	2159.77	1283.74	1811.44	2272.51	2309.61	2636.18
LMO3	0.308455	0.192221	0.353939	0.056635	0.508396	0.804062	0.105932	0.378724	0.0826547	3.16993	1.0533	0.187346	0.916803	0.0701185	0.167158	0.00679201	0.0356156	0.28557	0.446085	0.0927971	0.632032	0.0926182	0.0703111	0.277826	0.0780288	0.14241	0.123795	0.337282	0.0043772	0.323542	0.928418	0.0405219	0.23458	0.185272	0.25921	0.08426	0.277232	0.326838	0.0263889	1.73485	0.441435	0.142468	0.510491	0.0159853	0.106248	0.503454	0.0513149	0.245568	0.162129
INSR	10.2776	2.99674	14.2297	2.2551	11.9318	11.4863	15.4937	9.0815	14.6508	9.16979	10.1949	4.92412	4.71033	5.47625	7.04702	5.13382	11.3957	3.90973	6.03804	4.0683	3.4882	11.8948	15.0505	5.69502	6.76892	7.36295	3.2359	8.34488	15.0551	4.65454	13.1242	7.07694	9.07064	8.12173	23.1352	7.87021	5.04505	4.99124	4.16696	13.0703	3.73611	7.47256	8.49863	9.89442	2.74888	5.16043	2.5513	5.37609	12.5334
TGFBR2	34.8954	18.6082	35.8398	8.36524	56.2018	43.9261	50.4605	31.137	73.455	166.226	39.7485	7.81571	11.6026	5.18384	14.4513	48.3468	50.2649	14.4967	18.0984	31.7546	10.6794	8.86112	16.0696	7.74407	4.59035	19.3615	12.8208	31.7865	79.6284	5.06561	40.7423	13.6055	14.0182	25.1657	18.0711	21.5847	4.74482	17.7396	22.0824	8.8587	14.2944	56.0331	75.4693	33.8598	8.72846	9.11193	2.68827	27.0533	28.7501
SNX1	8.61391	7.08056	9.38371	9.10578	11.4041	19.6166	9.51433	7.40406	10.8435	14.5576	11.7611	8.45784	14.0668	8.89079	7.48797	6.89084	7.39338	6.16824	10.6622	6.03617	13.0701	5.25461	8.09554	5.88875	6.38322	7.96277	4.81005	10.2046	6.61653	7.78277	8.41683	8.49459	7.84522	8.86641	5.91723	5.27272	8.43903	25.8628	10.6379	10.1435	9.63058	10.5443	11.7848	9.22934	9.09016	7.39176	8.96712	8.82759	5.66721
APOBEC3G	0.630899	0.310675	2.53565	0.737484	1.69032	0.66148	0.252113	0.466196	0.21282	0.933316	0.801948	5.23136	4.19481	3.20068	0.333774	4.76742	2.21644	0.472066	12.3452	1.54517	11.5163	0.97712	2.01744	0.501142	1.64722	4.53572	4.88061	3.5733	0.580973	2.28725	2.43841	0.862294	1.1296	1.985	2.60904	0.369418	1.28987	5.25432	3.98642	1.97264	8.21562	0.394249	19.0696	1.21768	1.86485	1.33461	2.42195	2.41211	1.54555
SCRIB	9.6459	22.5173	20.4541	54.2417	12.8161	11.1766	18.8523	9.19954	26.8343	9.7882	14.8286	38.1403	39.5692	31.8842	32.02	37.7235	29.6761	54.0928	38.6024	38.1406	22.5337	37.5735	28.5549	41.9945	30.4073	35.4925	19.2606	21.564	32.7488	56.2915	21.8472	71.8042	31.4051	23.7265	12.4557	66.3774	38.3885	35.8346	34.3725	30.6392	35.6517	30.4137	18.9382	47.8999	40.828	42.3777	42.7607	39.4382	33.675
PON2	3.72244	10.6759	7.51128	4.59601	5.77117	7.20828	5.76165	2.32798	6.6578	10.964	4.63247	4.45743	13.2135	12.8024	23.5885	10.5639	10.7693	11.1514	7.64306	8.71695	20.29	12.4511	13.0775	18.3192	5.28848	23.1512	25.2668	7.46476	11.9635	5.96571	13.1675	10.3642	10.7133	21.8743	13.8145	54.9568	8.26862	14.1072	11.2009	10.825	10.8099	19.027	11.3537	9.76911	14.0642	11.969	10.6243	9.18611	44.9886
SIX1	0.014402	0.312049	0.30503	0.0208241	0.160227	0.0862447	0.0415746	0.350209	0.186178	0.344621	0.134737	5.9205	4.42712	3.33872	0.309707	1.80452	0.291843	3.74492	2.29823	1.75282	2.88223	0.105744	1.81461	1.19925	2.06571	1.11177	1.01309	0.577165	0.159336	4.62912	0.300343	0.0603719	2.10201	2.04474	2.18244	0.368868	1.546	1.27102	0.716576	1.92244	2.6634	0.19475	1.43464	0.183693	0.282534	4.89031	1.22535	2.06945	1.80543
IL11	0.0731962	0.146395	0.180615	0.10886	0.0751693	0.0389624	0.284291	0.0959941	0.0654182	0.0326703	0.0655009	0.293844	0.191214	0.967741	0.519272	4.67373	2.20206	0.740795	0.392104	0.590595	1.28892	0.665071	5.44592	0.385833	0.654017	1.42641	0.511891	0.404262	0.370195	0.474534	1.74362	0.967702	0.308147	0.906476	0.946366	2.90194	0.373351	0.382397	2.10601	1.16616	1.02826	0.138571	0.232702	0.671241	0.0850929	0.681297	0.38536	5.06491	1.76592
FOXO3	17.6769	10.3627	15.735	12.3437	19.8671	24.8479	14.6432	17.4343	30.5111	28.6969	20.0247	7.05187	12.6735	10.7802	15.5161	8.53877	17.0302	12.8722	10.6146	11.0437	24.3266	12.6006	14.1072	8.40506	8.86289	9.44857	12.0168	13.2278	12.0177	14.6362	9.50075	9.87642	9.69279	14.0576	16.2691	22.0627	6.52595	18.8924	7.65893	13.7207	21.1415	6.38019	13.5778	4.78318	9.95265	11.0758	17.6764	9.09728	12.1085
CASP2	2.48406	4.42748	6.05935	3.59326	4.15991	2.21892	5.0053	2.20327	5.16975	3.00909	3.92662	7.96523	11.6727	10.3356	4.47697	2.81309	5.09692	8.64101	7.92334	8.94492	17.2557	5.35843	11.9176	9.09548	9.294	5.86459	9.90923	9.3638	4.91762	10.6585	7.77341	5.09526	7.4902	9.15389	4.99468	6.36333	6.96088	12.9992	5.64897	8.55491	11.5429	8.50916	6.88715	6.0359	5.16771	8.21613	6.0519	5.00718	12.1711
CSF1R	10.3466	0.79165	5.70365	2.92589	15.7732	4.48183	15.9847	9.71891	1.09762	10.8948	10.2296	8.3146	4.63987	1.69104	0.538527	6.35439	12.3711	4.99834	15.1242	11.921	6.10357	2.88085	6.12284	2.23556	2.66972	14.8972	4.98315	26.4564	1.45716	2.35963	9.43959	4.52102	5.92386	0.204805	6.3102	4.58795	1.75646	3.12729	1.93371	1.21267	4.10149	1.23521	29.5228	4.88762	4.15869	1.2061	2.82371	5.0186	5.29669
NOTCH3	2.99691	80.1113	2.34518	78.8763	12.7935	10.6591	10.1543	3.69152	2.8432	33.797	5.87161	96.1563	90.8662	80.9806	39.4396	46.089	32.0474	203.191	50.1383	109.651	127.688	9.56005	10.6583	193.593	69.7506	48.9786	25.3626	85.7637	9.00911	84.5181	24.0347	59.3016	154.147	19.7299	20.8379	36.6909	102.88	15.183	61.1564	58.0455	52.1944	11.4672	75.1627	13.6313	91.0366	140.233	86.0382	29.7789	42.4862
RBP1	1.80237	4.39633	0.568282	5.96089	1.69671	1.79444	0.861903	1.10527	0.185375	2.64431	1.55179	3.92123	35.4499	59.0901	2.28647	18.6242	1.22004	32.7279	6.83418	56.2513	24.3382	3.74492	0.49986	4.94923	2.33763	16.1121	11.2945	2.71118	0.207173	16.3793	2.45845	7.73297	1.14994	2.17009	4.78248	3.13216	14.0965	4.17371	7.36626	0.707107	1.77061	1.72412	2.92868	0.462359	23.3394	6.6784	116.172	26.2355	3.8977
AR	0.479011	0.202598	0.0339867	0.737184	1.11194	1.69578	0.522105	0.672361	0.0224704	3.61648	1.04082	0.402351	0.376167	0.0794559	0.0352851	0.0345745	0.127228	0.432933	1.19218	0.23619	0.155653	0.0421373	0.0366288	0.0257209	0.105898	0.322387	0.0384626	0.329847	0.094112	0.0261094	0.468528	0.12337	0.274764	0.00947631	0.103589	0.19668	0.0624483	1.00282	0.210406	0.133114	0.260091	0.0386298	0.739533	0.0227317	0.340702	0.0535306	0.0278162	0.185363	0.0496429
CDKN3	0.415293	1.67337	3.07426	1.68046	0.61057	0.557375	3.28632	0.279303	3.56887	1.27271	0.831624	40.8203	4.21059	4.76359	8.38531	32.4898	7.44725	8.43335	9.5736	7.1215	7.50046	16.6241	6.96148	9.19243	32.4355	7.24105	6.54518	5.99593	4.0147	12.201	4.71608	2.6508	3.01278	18.7355	7.33736	15.4345	8.92739	5.10214	11.6295	4.97037	12.1974	9.00442	4.01727	4.63502	9.23492	16.6664	10.6317	5.42777	22.3874
NOTCH1	2.15097	11.679	5.88053	12.6662	4.96524	10.5965	4.64878	1.91824	23.6113	21.1816	3.13911	16.6308	55.4237	51.7189	17.3144	48.4877	15.0504	35.5575	15.8545	43.8401	21.3567	7.69862	18.3439	43.2545	10.9343	16.2708	14.6895	22.7896	21.0589	39.5422	10.5303	20.7937	21.7024	14.5636	14.6193	43.8169	11.7431	8.12114	15.8386	5.34929	19.8749	20.174	23.6268	7.36855	8.43455	24.791	18.1062	31.1858	17.3163
DAPK1	5.52697	1.51979	8.93313	1.06276	13.2976	7.76591	8.09205	4.8577	24.5175	9.30393	5.08018	1.6794	3.85485	1.34898	1.49878	4.22159	6.89542	2.52525	3.4609	4.53699	1.154	11.3076	5.79391	0.410827	3.59512	5.22183	9.4393	4.50616	7.11744	1.06651	13.2681	4.19857	1.42278	1.3844	18.0492	6.36301	1.53283	0.996007	4.12389	9.01484	7.24085	17.7436	6.1664	18.2209	2.23022	3.37168	0.964379	2.01733	5.68273
FOSL1	1.26401	38.9373	8.14688	22.4626	2.01274	12.6386	9.94054	3.06856	3.00943	6.68996	1.6183	27.6307	1.82079	11.7216	12.6607	89.2728	17.7704	16.2024	27.8242	23.929	14.2967	47.4594	33.2148	13.3685	20.7074	42.7057	96.5148	23.4611	4.46592	40.5772	25.6428	47.7678	17.5753	18.4307	2.48212	51.2134	49.0035	6.64993	55.341	5.76398	75.1656	15.7942	1.52615	7.29321	7.58212	36.8238	107.892	116.666	243.828
PAK2	10.3834	17.3163	19.9816	12.1937	15.7281	17.0294	19.1742	10.3835	30.3482	22.4055	13.2033	37.8499	72.0798	83.2697	19.5659	42.6729	33.2537	41.4203	26.8504	43.3987	37.8942	24.2881	34.9186	38.0419	34.6669	21.3489	20.1062	39.9978	47.9504	46.9328	15.113	19.6487	41.8596	28.719	16.6951	25.6884	21.8096	30.3971	29.9328	24.533	34.5742	32.5174	21.7823	34.6398	28.2273	46.4239	46.9601	28.343	26.4308
CENPF	0.314417	1.69476	5.54916	1.57805	1.1722	0.221075	3.62177	0.201055	9.33662	0.620399	3.4245	15.6763	19.1788	18.5222	12.1761	19.4724	16.8895	22.7269	12.167	17.4058	33.8938	6.63402	13.7664	14.8028	20.2218	10.0965	7.67823	13.1906	19.0834	20.0037	6.4951	2.74711	17.5873	15.1506	10.458	19.0724	6.84616	33.1079	10.284	15.0913	14.4744	12.7912	4.2943	5.30744	15.1224	18.6889	14.1015	13.2438	15.3529
S100A9	29.343	4555.65	25.2777	18398.5	8.96016	4.65934	13.6226	13.9235	1.86023	50.2771	124.344	113.006	93.5042	1334.69	10614.6	92.2216	488.288	887.508	730.761	201.504	103.266	481.302	52.4123	1137.93	21.5796	2904.17	6237.57	2895.22	15.3063	3178.35	841.147	18491.1	600.976	5159.54	10.9521	201.645	9400.47	1409.65	1193.9	33.1486	2227.42	27.1857	34.3988	50.7226	16608.1	3654.26	8082.46	218.918	75.0373
TRIM50	29.2947	0	0.387487	0.00648737	23.7129	14.6838	23.9597	29.0295	0.0100248	0.101241	30.1233	0.0556241	0.02797	0.0284407	0	0.00466803	0.012239	0.00957402	0.0253377	0.0170074	0.0198652	0.0360311	0	0.0119965	0.0263744	0.102366	0.0085797	0.105768	0.288804	0.0214328	0.101283	0	0.0340269	0	0.955443	0.00951952	0.0218449	0.0468793	0.0957614	0.0135236	0.601639	0.0637043	0.0416029	0.00507066	0.054767	0.00930983	0.0246055	0.0176113	0.0106122
HSPB1	52.5859	1675.69	115.34	2142.28	69.9362	162.313	90.795	41.2296	10.7012	209.855	71.1239	1236.62	612.551	1009.88	1196.63	809.675	227.059	920.782	1358.32	673.675	668.197	295.969	66.5449	3670.24	1818.77	1653.94	1856.35	309.539	20.0245	1336.54	407.526	1913.78	749.29	806.671	120.245	542.151	2013.31	255.792	1604.69	585.19	1532.92	260.705	377.164	292.36	1595.79	1423.77	2411.06	256.188	137.58
ADAM12	0.136815	0.0415457	0.508842	0.0901061	0.2189	0.0598095	0.133211	0.0780122	0.118986	0.312705	0.746849	3.72247	4.21333	6.4497	0.376284	2.89642	5.50571	9.93103	4.69791	36.0359	8.12899	0.223838	2.3078	1.36936	7.03611	8.59477	1.27509	12.9865	0.750984	5.00659	0.857704	0.521729	3.90613	0.0912071	0.707262	1.88114	0.382486	7.60044	10.0118	2.59555	1.42975	0.241314	4.21089	1.68645	0.484071	8.98811	1.55965	8.9561	1.5517
TLN1	22.6048	51.6948	34.5442	37.8156	49.4404	250.892	44.4653	23.3367	62.7226	353.325	32.7046	35.5103	36.0657	33.1479	34.9187	69.9284	140.665	72.488	64.2756	62.536	39.8728	22.7178	52.1924	31.3966	37.5653	43.4094	22.4946	67.7995	44.7332	54.9883	56.1124	33.7585	61.4394	29.9371	42.528	48.0436	26.3746	51.2168	46.2517	45.4042	29.0265	51.6519	98.9937	34.7552	21.1358	48.3024	22.9687	74.5422	46.1379
IGF2BP3	0.00689133	0.0415675	2.83033	0.459307	0.0530782	0.0122275	0.0337585	0.0150629	0.0205301	0.0353155	0.0224248	0.10849	0.111834	2.78604	2.32222	3.08783	4.36961	6.57955	1.10452	5.2892	3.38596	2.04291	0.427272	3.33074	1.61885	0.222249	4.39518	5.42134	0.281204	3.87826	2.76958	0.930338	0.0995499	2.89965	1.83789	2.88114	2.32633	0.111435	2.18144	6.15038	3.69861	0.192587	0.486859	2.7934	0.622218	7.30634	6.4543	3.31428	4.14483
CEACAM6	1.27477	59.5939	283.225	216.565	2.87811	1.8811	0.517776	0.693087	346.16	0.187436	6.03466	0.665594	13.9276	4.89596	757.928	0.936879	297.215	16.6532	46.6815	9.3279	6.66114	127.133	242.645	0.386605	1.64396	70.9051	17.8635	1.48422	646.696	40.8213	228.045	367.748	30.4817	123.508	139.132	249.036	410.865	35.2301	3.93125	1.23574	10.9246	1124.6	6.65944	4.14108	158.737	39.7169	16.9871	3.4448	1.48919
BAK1	6.3637	13.3421	31.3036	6.2365	7.82111	4.66552	10.3913	3.86378	18.8962	4.93996	5.47177	11.9246	9.41934	13.9586	21.0758	26.9303	34.0939	8.81041	25.8525	11.5491	8.86868	18.6411	27.5188	15.3138	14.4111	16.8298	27.0761	18.7818	28.9136	14.7412	18.6524	21.1528	10.5553	8.27185	14.7212	14.354	14.8772	9.2811	19.423	12.8027	28.6877	17.091	15.0423	46.0687	20.2058	10.2755	13.4778	13.4411	6.85101
RHOC	7.56207	22.785	35.0838	5.71069	10.8123	11.5574	12.1312	4.74756	9.40402	18.6527	5.82413	12.9212	9.99668	14.0621	34.1105	36.3303	23.4792	19.9154	19.8702	25.9631	27.2078	25.4229	25.4247	40.3612	26.2199	16.4627	37.4258	17.6632	21.8226	15.2034	43.5227	15.6041	9.54365	19.9133	13.7653	18.072	20.2469	8.26278	19.4732	10.4457	15.1389	34.2783	26.7465	58.5282	12.8425	17.4149	19.156	22.0812	44.2453
BIRC5	0.261359	2.45013	4.29943	1.9181	0.956082	0.159126	4.29283	0.179223	2.13957	0.340561	1.3049	15.5749	16.424	14.5224	6.16686	16.5256	21.7972	11.3104	11.3415	10.5649	19.8064	6.84345	14.8344	10.4608	42.0887	7.46545	16.0016	6.89297	10.6531	18.5143	4.94475	5.07643	6.60556	13.9578	3.91702	12.0724	7.96066	10.8047	14.813	9.90795	14.3933	24.5316	4.13822	7.99589	9.40112	17.3846	16.1014	12.8194	18.9266
GATA6	48.2647	1.06198	20.3159	0.372617	54.902	17.358	65.2202	32.0527	59.4873	4.08478	34.9059	0.768492	2.10378	0.194471	8.71035	1.71478	20.7081	0.794644	1.87114	1.66656	2.60048	15.4282	23.1874	1.17744	0.7591	1.47585	2.82951	1.92264	36.6054	0.551262	49.7487	8.54306	0.705674	15.9528	11.1075	9.37029	0.409046	3.35098	0.456067	0.495077	3.42741	26.8997	10.5666	92.2063	0.469546	0.56705	0.304397	8.04233	0.133964
ATOH8	1.85339	0.60984	0.693408	0.212687	1.51453	2.63768	1.69897	0.808811	2.68269	4.72823	2.42394	0.22542	1.64103	0.0621614	0.559264	0.036347	0.200626	0.27857	0.255437	0.109774	0.157934	0.126986	0.0594104	0.231065	0.0951144	0.41288	0.108997	0.199385	0.0684236	0.193234	1.14836	0.290517	0.254985	5.82358	0.895669	0.148245	0.119363	1.47689	0.185517	0.155179	0.398284	0.113129	0.886562	0.0477941	0.181422	0.045783	0.0282339	0.189453	0.0695839
SORT1	8.82482	22.2114	27.9275	42.3492	13.5234	16.9904	16.1919	8.44718	10.1719	30.5647	10.3394	1.7634	6.5483	3.57643	40.3334	5.82894	17.1261	9.03837	13.1654	7.79232	26.2225	7.68977	3.36756	11.2844	5.84319	10.739	3.74019	8.28379	20.2412	4.57571	20.5587	37.1346	11.2791	28.7935	15.4461	25.8557	23.975	20.3197	3.94103	9.52336	6.85214	15.905	13.9722	10.793	15.9529	5.16966	12.5738	6.4587	23.2232
NFKB2	4.68711	7.17561	21.4565	8.42982	9.92543	7.68214	6.30695	6.89509	15.7569	12.0463	8.01271	13.1825	5.89697	8.35732	12.5041	25.9608	26.1866	11.8293	15.86	8.08436	79.3524	19.9563	33.1108	15.1722	10.9375	18.295	50.8692	25.8311	12.9377	12.6486	33.7873	15.5581	9.4126	24.8923	6.11808	37.9527	10.6062	48.3618	17.2632	28.4996	20.7952	19.8653	42.3837	64.0843	14.1697	12.0793	20.4681	21.1632	18.5396
KL	4.84514	0.143628	0.232178	0.172526	4.34832	3.12178	3.2838	3.19909	0.116021	2.2552	5.84477	0.109576	0.420131	0.219437	0.192026	0.10805	0.329504	0.0636532	0.152237	0.211491	0.716136	0.0603321	0.0925502	0.0945295	0.116901	0.217574	0.162677	0.317743	0.135564	0.100275	0.78146	0.246882	0.4357	0.0342054	5.85823	0.421939	0.0609636	0.467518	0.0964657	0.183155	0.539414	0.0418311	0.463047	0.0923972	0.14385	0.0894064	0.0751304	0.123594	0.101914
ABHD2	37.1208	20.3137	77.287	10.2652	44.9573	29.9162	81.7042	24.9419	147.788	18.3653	29.3051	14.7229	43.8024	12.735	20.8449	17.4593	39.1978	47.2488	26.4939	20.2695	27.7057	9.56407	69.0201	8.38245	12.1492	9.10736	4.41312	15.8781	58.8261	36.4416	47.7981	12.9485	98.3834	88.3136	16.8598	31.1527	9.99719	6.64607	7.424	7.89357	5.36547	51.5951	17.2155	45.1373	9.73066	36.5705	13.014	13.0486	18.3068
RACGAP1	1.83002	3.90494	9.57962	6.23534	2.58038	4.03178	7.51937	1.21429	5.83015	2.59304	2.69038	17.358	14.4687	10.0484	12.2833	23.2934	19.0172	8.37325	16.8983	12.4464	31.438	4.54285	17.1149	17.7517	28.7277	7.69878	12.1315	19.4748	33.7439	16.4343	9.04539	8.89925	8.15735	33.5247	6.5481	22.3697	12.9913	11.6059	18.4135	19.1896	24.638	21.655	6.68138	10.3608	15.1429	21.5696	17.9884	15.0531	19.3281
EDNRA	0.396734	0.970983	0.603312	0.728016	2.28192	5.11994	1.13316	1.03859	0.562493	10.0802	0.889439	2.53463	3.42366	2.84072	0.822269	5.56486	4.78675	8.79208	4.56434	11.7013	5.32925	0.800216	1.70037	0.43348	3.13329	8.14161	3.2388	5.25108	1.57753	1.21834	4.05052	1.7553	2.1306	0.652922	4.26986	6.9802	0.954054	4.03857	9.88964	4.27478	2.2025	0.282796	10.3151	2.49659	0.697187	1.66012	1.24906	5.78934	2.6094
PPP2R5A	30.8007	20.7473	24.922	29.2284	31.4201	20.5779	34.0222	26.869	33.1746	16.3676	26.8822	34.4279	47.5045	26.7008	29.7611	10.1952	20.9541	45.7777	25.4244	24.277	12.1352	23.8871	29.7695	19.555	14.4255	25.796	13.0722	16.8517	24.7315	32.6449	25.1251	20.5196	82.8188	20.6717	24.9684	28.9897	22.5539	18.9743	9.63701	27.5377	15.2093	16.9613	14.0505	21.8619	38.7896	49.3781	36.9239	12.7859	12.4109
LIF	0.197034	0.910125	3.12377	0.508741	0.851537	1.05756	1.21513	0.296086	5.70428	1.17014	0.512929	0.476918	1.74888	2.99459	5.25489	0.374854	6.69802	1.18626	1.68815	2.36336	1.95913	3.88346	14.0264	1.06495	0.277977	1.12555	1.65245	2.86984	5.1128	0.910973	5.79497	3.12273	0.866085	1.11548	5.9304	18.9707	0.790304	1.61389	4.57132	5.51049	9.54259	12.194	1.87921	0.655315	0.375083	2.12599	2.82489	3.90293	7.69299
AFAP1L1	0.646031	5.27719	0.592681	0.862253	1.12346	1.64593	1.00853	0.321337	0.306668	5.57186	0.976995	0.658472	1.74076	1.99257	1.61584	11.0424	3.58695	1.31795	1.58763	4.64658	1.85032	0.786761	0.770284	1.35405	1.43558	1.73623	3.00926	2.56612	0.678317	1.67304	2.04064	3.28498	1.72546	0.904826	1.0551	2.61337	1.2405	1.71225	6.86902	1.43725	1.93241	0.399462	3.28262	2.00047	1.27338	3.25061	1.72084	4.2821	1.14183
EZR	248.461	96.9445	225.611	148.611	170.959	87.3155	295.848	142.144	182.156	79.989	200.195	36.6728	31.7697	45.4634	208.015	171.04	279.306	74.9918	91.7178	128.347	82.0082	214.93	338.815	152.762	43.6596	64.6961	214.251	54.6464	177.971	119.255	180.375	192.843	87.3345	112.951	48.4602	142.41	171.401	81.26	72.9504	188.506	106.49	185.873	68.3728	180.983	142.844	82.8484	128.347	63.5048	116.692
CHI3L1	0.980977	0.890571	1.57599	3.27527	0.35839	0.0865203	0.277009	0.0564261	0.307627	24.2395	23.2459	6.40771	5.73566	6.48328	1.98401	2.53068	33.6585	16.7847	66.1048	3.42341	20.9991	5.80215	15.127	6.44232	10.0782	107.004	22.0655	269.749	1.61225	4.50211	8.62359	9.35644	15.524	4.43521	4.26265	8.31157	3.92632	259.383	18.6811	43.9745	62.854	0.786085	21.7457	16.4752	5.6454	3.41464	16.4063	34.0697	5.90829
FN1	8.81165	31.3728	2.31901	18.1379	48.8347	120.576	31.3371	6.70801	2.03341	291.864	22.8904	79.9188	64.2026	72.5883	5.03244	57.0442	115.47	412.078	185	966.746	383.927	4.55556	60.337	51.4739	100.538	150.738	35.8811	550.803	24.943	21.0689	30.4421	7.84105	47.6562	5.7581	54.2372	92.4475	12.0223	37.5528	417.681	270.851	50.4629	4.21205	217.027	47.6578	12.2108	27.5286	20.1484	458.876	46.6095
KRT17	5.41748	1233.69	8.70273	42.501	4.04272	0.170918	8.33206	0.0336881	72.3614	0.164336	25.4151	673.036	915.034	2520.48	410.346	2152.51	29.0416	1052.43	962.877	865.719	410.458	86.4215	191.848	5883.56	1164.34	617.284	2475.41	296.264	0.841502	1537.91	109.679	432.405	180.489	908.034	3.65134	10.754	1559.9	258.558	1639.94	4.57257	444.278	134.33	5.55318	10.2769	254.195	3097.12	2631.75	898.609	51.2502
YWHAZ	36.6539	156.11	112.727	130.779	45.2365	41.4105	65.1858	30.7925	90.4822	48.3102	30.2275	147.615	97.167	84.6663	143.847	276.248	108.886	133.755	211.714	128.122	118.478	251.569	201.807	154.205	120.289	157.898	163.804	135.628	175.583	226.265	98.6437	194.313	219.991	122.41	169.468	115.833	180.684	74.0884	222.838	277.554	90.4542	122.305	58.0717	88.144	195.062	235.578	231.402	207.955	174.137
TRAF2	1.9428	2.9483	5.71144	4.93471	2.90505	1.78988	3.08149	1.55161	7.45512	2.07257	2.86573	6.73887	4.30015	4.40152	6.17191	9.73852	9.37354	3.75194	8.18133	4.70249	17.1606	7.2156	6.27415	9.58198	4.84787	4.29231	12.6909	9.72419	8.93257	12.2091	5.65484	7.83768	4.18331	7.23309	7.47717	10.1402	3.99453	12.7987	3.54476	4.29311	5.78859	8.52133	11.6176	12.8707	3.7229	3.45855	4.79704	5.60272	21.7571
LAMB3	24.5593	68.7448	59.4932	19.6751	22.4597	5.46464	82.9359	11.6268	51.8749	0.938972	12.1898	43.857	123.212	137.607	52.681	282.071	65.1994	144.561	21.6296	398.972	154.776	27.3401	101.347	161.989	33.2899	106.269	109.629	50.7034	48.3605	125.618	127.69	47.7927	59.1792	31.8144	16.9942	61.6633	182.999	50.9197	149.371	0.890689	111.923	65.5706	22.9103	89.5128	91.2914	206.544	111.597	140.861	33.8564
SNAI1	0.869694	0.574283	1.37344	0.641927	0.55573	3.72408	1.31462	0.468901	0.821693	3.74951	0.396205	2.71093	0.509466	1.3721	1.76868	1.79246	4.00068	2.28354	3.70463	3.16483	7.69835	4.86368	2.37099	1.49711	2.91357	1.83804	1.87532	5.59215	1.65945	0.949601	1.70524	2.34819	1.08403	2.31821	3.9598	14.4106	0.408653	1.46258	11.8284	2.75622	11.9611	1.05582	5.45606	3.46727	0.417899	1.41619	2.81991	4.96782	5.50118
TNF	0.0699906	0.211086	2.61935	0.559013	0.309472	0.124187	0.0244902	0.114738	0.305319	0.104132	0.104387	0.312194	0.567912	0.647892	0.0930995	0.429982	2.27896	0.206247	0.42161	1.36445	0.968035	0.13918	1.02106	0.766389	0.164572	1.02456	0.478001	2.06635	0.227943	0.159211	1.44456	1.9033	0.223878	1.09379	0.124205	1.54158	0.530092	0.609417	32.4378	0.221009	27.9269	0.115676	1.14964	17.5001	0.413612	0.601667	6.11945	5.46189	6.11736
EGF	0.00319091	0.987679	0.27558	0.0975488	0.00546154	0.00283087	0.00334956	0.0104619	0.00203703	0.0126598	0.0415337	0.80124	1.50233	1.1616	0.820595	0.0189708	0.0348173	1.13808	1.14299	0.323126	0.342302	0.049786	0	0.19989	0.857479	0.186111	0.5666	0.586729	0.269582	0.888443	0.0137205	0.0144049	0.853413	0.101615	0.00242681	0.027081	0.201229	0.216712	0.0866793	0.0192359	1.25074	0.0230127	0.0101444	0	0.741907	1.14261	0.477981	0.0339966	0.0905687
IL1A	0.055228	4.61118	0.635961	6.24391	0.0393866	0.00816609	0.0193246	0.0201193	0.052885	0.0182595	0.277061	0.246345	0.229528	3.37861	11.852	8.34542	2.53481	2.18303	0.576254	6.76399	3.30227	1.06444	1.49809	7.88974	1.2615	4.1307	75.7377	15.4062	0.190445	3.04652	4.21909	13.9382	0.455889	24.028	0.105008	2.338	5.8645	3.66153	23.8609	0.166466	4.15048	0.107873	0.370666	1.24833	12.1078	3.90178	21.9975	56.4874	1.9781
THY1	0.848022	0.889362	1.2756	1.1696	3.55525	5.12878	1.88775	1.28741	0.876293	31.6877	1.37976	21.4749	10.2147	14.3009	1.99853	8.5042	19.8109	24.0646	9.85603	47.6733	25.5194	8.7764	7.23873	6.13307	27.2331	26.4344	5.72757	28.212	6.5616	6.36132	6.26552	4.83696	4.80885	1.42149	9.69188	17.4247	0.869078	4.85388	28.5275	9.56222	5.93203	2.40353	39.0622	7.45624	2.6104	7.913	9.36852	22.4867	5.89366
ETV7	0.922359	1.89808	17.2458	0.816524	1.50118	0.774451	0.760742	0.963031	1.96623	0.445174	0.783851	12.7445	3.52529	3.34598	5.28003	7.43721	5.30597	1.53138	15.2279	1.36018	7.63008	10.3398	16.9175	0.754962	11.0265	10.2621	5.94379	5.14188	4.04203	2.37726	9.61049	3.18663	2.81947	3.16892	5.21733	1.15822	5.18583	3.66316	2.27361	1.57447	7.32164	6.13232	17.2798	14.28	4.47098	0.883708	3.18468	3.5235	4.46901
SPP1	3.49571	0.746085	1.50345	0.375826	1.29036	3.25074	1.76844	0.672024	3.41463	5.4599	1.20605	555.488	18.8592	9.17382	2.11393	48.3365	34.6111	1088.4	181.412	190.7	60.0902	67.1431	22.6723	42.5354	67.5283	327.291	65.043	375.106	0.755216	15.2331	27.7006	5.63333	654.134	0.760024	5.88101	45.5945	29.6616	9.59334	4.16073	112.447	62.5835	1.45039	4.47215	77.8174	33.7105	225.158	78.0773	163.477	174.679
WNT5A	0.882651	19.7549	0.990766	12.4364	1.70402	0.545839	4.21029	0.578781	1.86277	1.60932	1.67263	53.2077	13.6328	17.901	10.9258	0.893632	11.2064	58.3717	21.5587	30.08	16.1601	4.90819	4.75239	2.37392	15.6127	11.6571	3.50762	3.62818	2.96908	13.1116	6.3448	13.3016	114.759	2.94859	6.92811	15.5863	5.78295	8.30986	16.7448	1.9361	5.31223	0.793364	1.30676	3.55257	8.89395	55.8467	21.5816	9.92073	2.27543
PTGS2	0.126158	5.21248	1.0987	0.459866	0.384229	4.3222	0.860795	0.364965	0.274773	11.8911	0.428636	0.405982	0.947286	2.54695	1.6123	8.12909	9.33899	1.72834	1.6093	1.32213	17.0708	1.53587	8.01817	12.2201	0.167016	0.827476	1.57114	2.58164	1.57167	5.50996	4.37158	2.05315	0.702937	2.76695	2.42692	9.72168	1.35236	1.95509	22.2241	4.32985	1.70956	1.19417	1.01842	2.11111	0.468025	10.2928	14	8.56193	0.639423
PDCD6IP	13.8464	29.5761	23.6033	34.4447	20.295	14.731	25.2527	10.7259	36.1555	17.5658	15.8591	12.7875	10.0805	10.433	26.6733	24.5431	25.2307	15.1218	11.7428	14.5886	11.7547	14.6061	33.588	12.1644	10.3122	15.5973	13.5218	24.633	22.6056	10.9652	16.0782	33.7183	20.8248	26.3892	16.8449	14.0981	20.8396	14.2538	18.0721	30.7192	14.8541	19.027	17.321	33.6715	19.6	11.7831	13.5835	13.691	21.1735
SIK2	21.4766	4.69873	8.65431	3.54039	22.5027	44.334	42.3067	21.1551	15.9069	16.0126	30.8403	3.02414	3.62351	3.36158	4.35731	5.12113	9.10167	5.23949	5.2696	4.80505	6.50266	4.20745	5.99282	7.17052	2.23913	3.84546	6.06926	5.14841	11.9061	2.70897	8.16109	5.18831	8.15119	3.79393	5.39452	14.4034	3.27052	6.26336	4.77308	7.24454	4.40942	5.16547	6.33646	7.70369	4.60784	4.58968	4.13663	7.85295	1.96107
TGFB1	5.39184	98.1951	8.33337	40.1694	10.9545	8.5224	5.69161	4.76428	2.47073	22.2243	5.56521	51.4388	38.1315	39.75	20.4213	62.0907	27.821	41.4906	62.6389	61.2666	31.2764	9.70322	12.2919	41.901	42.6362	50.6741	41.569	33.0707	5.32664	52.7742	21.1539	27.1561	36.7526	11.6969	17.6473	12.6351	54.5787	17.8987	77.7035	13.509	54.5163	4.44704	81.5614	11.5731	29.4457	71.5669	65.9639	57.0937	47.1609
TIMP1	14.9834	69.0548	101.66	18.3234	72.3436	63.1998	43.5892	20.1604	29.5702	294.939	16.6892	172.958	91.9716	81.4561	208.148	81.062	125.111	142.077	200.352	180.84	98.8964	123.287	188.744	124.865	182.007	201.63	243.801	346.669	222.742	33.1686	221.886	83.489	45.8391	261.468	691.34	98.6984	24.0143	62.9381	178.754	208.489	72.6619	316.355	1185.18	109.209	43.3032	59.2323	60.552	112.639	153.703
MAVS	10.3077	18.4634	30.7229	16.9399	16.6206	19.0231	19.5499	13.0894	35.4216	18.3249	14.3158	12.0699	28.62	25.2372	15.9203	9.55763	19.8887	22.5199	15.7752	16.3884	12.4814	19.4953	15.2561	12.5388	10.6149	12.0363	21.5939	13.7823	13.6876	20.3217	18.4599	20.6174	18.764	35.5935	16.3407	20.1826	14.9767	25.5491	9.16725	12.6273	15.2217	13.2842	9.99391	13.7887	17.3807	16.0947	20.4909	26.7822	25.9789
PIP5K1C	11.2035	16.0192	10.0943	13.1637	15.1943	34.7828	15.8136	10.329	14.4758	44.4003	14.0706	12.134	7.56902	8.30117	11.0669	14.4485	10.8215	14.6797	11.3232	18.0585	17.6132	8.13273	10.855	21.5913	12.8028	16.5697	20.0119	15.9064	22.2375	12.742	13.6484	20.6173	12.1888	10.1249	12.3524	9.02784	18.3724	9.93525	18.3868	13.469	7.04953	10.8556	19.8207	18.2241	10.4135	10.4427	8.71878	19.1403	12.9833
PDK4	35.2293	15.1383	4.34489	4.08933	50.2721	431.904	93.0586	49.5609	4.8084	279.679	67.709	0.378008	2.52238	0.313421	2.40166	0.614736	2.48845	8.32978	3.72486	0.909006	0.834073	15.839	1.89937	0.928728	0.372031	1.84946	1.03532	2.27579	2.79228	1.12486	7.5229	1.51223	6.76305	8.38881	10.3679	3.40422	0.361101	10.9975	1.14165	1.82192	1.04977	2.4064	12.4704	5.33928	1.30264	0.315481	0.355214	2.74621	3.0465
STAT1	9.974	19.1091	124.594	11.8623	13.8816	15.5596	14.7216	10.3568	17.9718	21.993	11.3538	81.64	17.3298	45.5171	46.6068	176.623	63.8888	52.3161	161.285	60.9515	47.0503	52.2593	92.098	15.3354	66.1821	104.246	80.1862	191.978	42.8697	36.4351	41.5812	56.5474	69.6556	21.0485	57.2508	46.4909	44.7127	64.355	49.6119	71.1138	146.389	35.0343	230.988	22.1731	56.081	31.5724	9.5854	92.482	63.861
IGFBP5	114.479	39.9137	12.8356	36.8257	178.366	338	79.2111	103.842	15.4412	290.823	110.534	169.135	21.1123	33.058	3.00077	16.5618	44.9305	202.86	69.1278	62.5087	41.7812	7.3005	39.349	24.1586	70.439	47.0681	15.8468	93.6035	8.69843	40.2784	58.3341	5.17099	34.07	5.04975	118.383	60.0354	25.0241	72.4893	48.0462	42.1341	8.17499	9.68519	99.3686	4.20408	22.2379	249.1	109.308	64.2465	29.0969
SLC2A1	4.09109	389.815	12.1576	45.6968	5.79674	4.56942	7.86838	1.47446	12.9242	6.24807	5.57169	59.2678	172.085	467.586	52.2016	318.078	46.8105	106.861	76.3673	204.194	50.5063	16.4539	70.15	1082.04	155.867	54.2983	48.6195	172.73	27.7223	120.036	16.2022	51.0403	172.092	31.433	7.14634	41.877	143.063	38.7568	327.182	11.0515	152.952	82.5653	7.61114	39.7152	231.968	306.45	316.318	144.179	57.1234
ATP2A3	20.9292	1.52623	22.4962	6.71874	41.8249	11.8668	40.4798	17.4517	35.067	5.6968	12.3722	4.10799	4.34463	1.64552	19.7794	4.52255	22.9488	1.6324	4.83273	3.46504	5.95035	7.78861	17.2429	1.12023	1.72826	8.70739	2.17416	10.8107	51.4443	4.60666	50.2147	20.6074	3.04308	41.1595	84.7903	20.0361	7.59131	4.05793	11.7583	2.23987	3.93987	23.4956	32.2601	35.6285	5.70104	2.28183	1.99989	3.32724	2.61446
PRDM1	2.9653	9.177	6.08235	37.0525	5.27241	1.4842	1.98171	3.13338	1.1307	1.25898	1.82797	4.85432	1.77877	5.72076	20.7644	4.85631	8.22207	7.07993	15.3126	9.22902	7.41692	5.68252	10.6973	5.57185	5.71241	12.8845	20.0234	13.9021	2.99034	10.9412	9.8835	40.3197	5.06655	9.50655	7.23727	6.47579	21.8293	5.69764	11.9565	2.49553	10.2861	2.85031	27.1787	2.51766	19.5719	10.0966	20.513	8.78729	7.95971
BIN1	4.78257	1.86496	12.0217	1.87669	6.3917	9.08667	6.8656	4.92152	11.5694	7.12528	5.18301	4.39759	1.53785	1.81924	6.18524	7.99664	15.2295	2.11763	3.21965	6.26609	5.15131	6.13481	5.56083	8.20826	1.63209	2.69507	4.33651	1.86433	9.62274	3.21176	6.69464	3.69392	1.49005	3.74888	9.63948	27.7198	1.2665	3.44722	3.23636	0.906359	3.33177	15.1067	8.38718	7.00814	1.27763	6.16756	2.18049	2.26728	4.73078
MMP11	0.38905	0.205051	0.702134	0.171647	0.536595	0.224517	0.487693	0.222914	0.921114	0.3428	0.841947	34.6439	21.0847	31.3429	0.512479	2.46121	10.5116	176.204	64.5414	67.1758	85.2188	5.10294	3.50511	1.58706	59.7495	14.9056	15.8534	110.316	10.8282	18.4379	1.94247	1.72221	11.9869	1.86441	13.1541	33.142	1.7725	5.48861	78.2752	23.6647	14.015	2.42103	16.8956	1.85389	1.28	20.3823	19.7297	47.4994	25.8042
EEF1A2	7.1634	1.43874	0.256522	3.04389	8.47415	6.91716	38.9585	6.61451	0.0995482	1.45002	5.28046	2.47027	34.4755	40.5453	1.05441	4.70498	0.212688	31.7422	0.673054	0.374718	0.0986326	0.0626143	0.0599829	0.290374	0.779161	0.381193	2.30568	0.505455	2.31335	1.23043	0.167628	3.87179	0.114643	4.85377	0.830178	0.360399	1.22924	0.785567	1.7884	153.127	0.248933	0.676527	0.402798	0.0755291	0.7138	7.69634	3.21915	0.114767	0.8694
CDH3	0.495352	29.5424	5.52614	5.65478	0.657345	0.884483	0.865536	0.0925113	17.6705	0.24877	5.41467	15.0364	17.4746	35.8894	23.4202	67.6285	27.3083	26.802	20.0017	70.0216	53.7888	6.82232	20.8325	59.6612	10.8007	41.3818	42.6138	49.8111	3.63251	49.8759	21.7631	31.4402	9.5243	16.4567	0.810694	0.10453	52.5273	54.8573	92.8951	8.04316	32.8562	16.8109	7.77433	31.8686	44.6129	31.7611	76.9402	73.32	83.0108
BUB3	4.15747	9.92246	7.57538	5.28007	5.17062	4.50337	7.16318	3.96185	9.96965	5.06752	5.53986	18.5636	11.8341	9.33993	11.4279	18.1591	18.6106	9.64056	15.6906	8.84853	15.7499	17.5911	23.1824	8.98299	16.7124	13.1017	12.9931	11.9322	20.0371	13.7132	11.0905	7.78989	12.5778	19.6655	13.6419	17.098	10.704	12.8297	12.3937	23.8739	16.2489	22.7127	12.1689	14.2476	14.071	12.3043	10.5395	12.8439	17.0916
COL4A2	12.0861	24.7476	9.75261	10.5872	19.2586	60.5613	19.9641	6.41295	11.1404	178.649	39.5008	47.5874	70.02	87.2745	18.7192	84.9178	92.3646	80.29	44.7144	131.765	132.161	13.7039	33.8661	34.68	38.4317	27.3838	38.2608	80.3729	32.3756	16.9203	52.8917	52.861	39.7386	7.21886	57.3961	123.528	6.56651	284.121	62.1885	35.4724	24.064	14.3189	120.892	75.0799	10.6723	55.7942	25.3079	151.005	36.8322
GLO1	26.4999	60.6893	46.9431	25.5971	26.8329	34.6232	38.6983	19.786	61.3483	37.7114	26.0617	56.0742	46.5931	48.5916	156.131	111.04	62.9153	53.456	78.1072	72.5028	82.7348	108.363	56.5818	96.2944	64.1644	47.1247	81.0076	50.8864	93.2629	101.011	76.8024	36.8497	72.3555	68.1403	63.5856	143.577	62.1876	56.5222	76.2517	137.895	67.9075	42.8557	41.692	48.1418	121.764	57.9734	75.9281	70.4719	56.5509
INS	0	0	0	0	0.0215611	0.0223515	0	0	0	0.0249892	0.0204959	0	0	0	0	0	0.0130907	0	0	0	0	0	0	0	0.0169258	0	0	0	0	0	0	0	0	0	0.0574836	0	0	0	0	0	0.0495004	0	0	0	0	0	0	0	0
CRABP2	2.80819	116.443	2.36825	982.122	1.29288	2.09714	1.39928	1.06833	5.66177	2.41514	5.89924	4.323	29.9475	80.9142	125.474	2.22958	8.67155	11.9522	43.246	57.6613	30.461	9.96678	1.23972	36.6331	3.79704	230.389	245.777	12.9047	7.85517	107.912	17.6843	327.716	24.9449	77.8242	0.702902	4.202	130.117	54.2527	36.2004	45.827	22.6633	27.1102	5.33024	4.5683	257.563	31.3161	393.795	33.9754	1.63351
FOXC2	0.0631177	0.172825	0.032447	0.26727	0.580671	0.720949	0.455509	0.0948481	0.03022	0.743424	0.834393	0.32294	0.15458	0.68112	2.49773	2.32186	1.19293	2.37142	1.68039	4.59715	0.970122	0.572048	0.167254	0.126573	3.25976	3.15622	8.64711	2.37005	0.149636	0.118451	0.251042	0.111939	0.498221	6.43475	0.450033	0.530892	1.34631	5.92362	17.4692	0.502797	44.6826	0.0355627	1.80595	0.178333	0.132994	3.72793	0.514272	5.6629	0.170618
MAPK1	15.5271	15.5764	10.5909	13.9619	23.264	16.7496	22.382	14.257	25.7368	17.3012	15.9469	9.58983	18.4363	18.5998	16.2421	17.3695	16.0611	23.6196	19.5996	20.7717	19.5134	7.87164	20.5367	15.8948	11.3049	13.1585	10.0881	15.6272	9.56411	20.2306	16.5817	17.0563	15.9359	18.562	12.4871	16.6768	16.655	11.0798	25.4822	40.4213	19.9686	11.7307	12.5816	10.1299	15.5455	24.5015	22.0663	7.21455	13.105
PLA2G1B	5.08686	0	2.14242	0	2.22911	1.00589	1.80137	3.28203	0.117375	0.0303944	3.36544	0.168849	2.85641	0.110999	0	0	0.0477666	0.0186828	0.0988886	0.0663769	0.0620241	0.478118	0.0209554	0.0936405	0.0205869	0.0210271	0	0.371514	0.10567	0	0.184469	0.0395249	0.0379431	0.081321	0.256364	0.0557295	0.0568379	0.114351	0.0169882	0.369462	1.95674	0.0828755	0.227316	0.0791596	0.160309	0	0.0192062	0.0171834	0.0207088
WNT2	0.0455424	0.0123927	0.262215	0.0215022	0.122493	0.144299	0.0614658	0.0426622	0.0789139	0.474305	0.0740989	2.75011	0.324471	1.70072	0.0230778	0.104437	3.8808	3.38352	1.61244	3.84025	4.56618	0.292589	1.67731	0.536789	4.00371	2.05805	0.860226	3.51441	0.426268	0.466189	0.201421	0.193008	0.435013	0.126614	0.974779	3.16311	0.0603371	0.242782	0.595123	8.326	0.824491	0.152495	4.81932	1.19327	0.32523	0.435858	0.689133	2.06127	0.422088
ARHGEF28	5.30549	3.42784	2.11293	1.58257	7.34632	3.16531	11.3738	6.23201	4.40111	1.37767	6.43953	0.891807	1.66417	2.14866	1.56198	4.00496	1.35948	2.13939	2.45544	1.73141	1.6033	0.865175	0.727675	1.26528	2.10174	1.49727	0.885755	0.931725	1.52819	1.80432	2.75068	1.4605	2.85138	2.47282	2.67257	0.967603	2.24189	1.75277	2.17644	0.155248	1.3774	2.13187	0.689857	1.16905	2.57161	2.01652	2.3578	3.78514	2.45514
CEMIP	0.123138	28.8451	8.02876	4.13536	0.316143	0.286766	0.347387	0.142987	42.6062	0.932559	1.48384	2.38281	0.590964	2.51669	6.24467	39.342	16.8098	3.27669	2.38423	5.51375	7.49785	0.868802	24.962	4.8172	1.25812	3.00837	6.19795	4.97972	5.57611	4.91064	5.97645	3.59178	1.83122	116.614	1.47501	16.7879	3.19992	13.5362	3.52559	5.24924	1.21724	176.117	1.45988	2.17529	2.44998	4.36801	1.79759	4.91976	0.672661
GZMB	1.09462	0.593835	7.08874	1.27076	1.04349	0.749845	0.552704	1.59001	0.353816	0.659673	1.0483	31.4876	2.27051	3.55509	0.417764	8.7402	2.04463	1.30094	16.4278	2.12343	4.52224	6.15496	17.5007	2.15937	7.11177	19.8425	14.3231	10.863	1.521	2.4301	3.08616	2.46629	2.38474	0.232878	2.90848	1.45313	3.71364	2.96787	2.23529	0.310248	17.2733	0.949319	55.6941	8.29501	4.50217	2.54651	0.929218	3.65175	3.6425
NTF3	0.261212	0.625133	0.121198	0.177086	0.452821	1.22406	0.154676	0.153717	1.65898	0.229192	0.239744	0.0105442	0.803264	0.0363913	0.184122	0.533585	0.0382809	0.147005	0.07781	0.304665	3.42301	0.25818	0.0870233	0.0102334	0.12149	0.390648	0.00731876	0.0631563	0.0885351	4.09992	0.287993	0.224611	0.178303	0.0236989	0.382042	0.544071	0.105595	1.96449	0.100253	0.0634484	0.190811	0.0362279	0.255518	0.0605561	0.167406	0.60356	0.247673	0.0600919	0.00452629
EIF4EBP1	31.5763	18.9498	28.5496	70.6361	32.1219	18.2177	21.0201	37.4763	34.3602	8.24099	26.177	124.721	60.9803	42.3606	29.2454	96.7786	92.9874	48.3451	43.4757	66.2952	34.2424	102.811	48.9427	160.214	130.977	50.0605	38.9241	41.6642	59.0925	123.994	28.8156	43.7712	21.5568	53.5752	26.745	42.6245	161.661	25.1572	120.344	27.6012	78.8473	80.8641	43.2516	92.5825	149.884	122.075	136.296	180.619	115.807
PHLDA2	10.6659	99.6123	33.7779	48.7313	7.25321	4.05014	38.1874	9.35212	7.4101	4.20321	7.69426	33.3248	15.2174	45.5926	46.6561	34.2981	48.3666	41.4879	21.6954	21.9502	21.6814	211.526	104.338	123.849	9.18722	34.7674	85.342	22.0617	38.6857	32.2441	139.856	65.6563	25.3991	63.69	46.1642	57.472	40.4964	13.9953	66.9487	26.5512	56.1303	189.001	13.8628	79.7088	22.2404	53.4387	92.4339	19.986	108.451
GLI2	0.208548	12.9556	0.210617	0.235564	1.21318	2.1195	0.629039	0.31447	0.0960584	3.27034	0.609906	19.8216	24.2762	23.6377	2.55165	0.304474	1.07948	54.1776	16.1757	16.6054	0.878949	0.251974	0.62461	0.728028	10.8892	1.45819	0.5625	1.6269	3.41822	26.428	3.53923	1.19343	12.7249	0.413325	0.847253	0.758541	2.00996	3.14835	1.80153	0.443316	0.350099	5.38551	5.11103	0.605214	0.51711	22.4866	5.79916	66.0875	0.181967
BAG4	3.06941	3.41503	4.64799	2.86861	3.5453	2.32995	3.35005	2.56365	6.25989	3.25008	3.56527	12.0484	3.62057	3.21763	3.96207	7.60391	6.37934	4.03518	5.62033	7.00964	9.42382	5.51849	9.66087	5.78606	9.49371	5.63783	2.67654	6.81543	8.10534	10.1153	2.67107	4.33653	10.2011	6.17113	2.71471	5.53528	8.87902	11.9545	7.64935	5.66832	12.5964	3.51837	5.35944	7.05993	17.5437	10.7833	7.76133	11.8179	6.81355
CAT	27.6818	7.97763	41.7705	15.6613	37.522	29.6214	29.1807	20.192	51.4187	24.9391	28.7066	18.2355	25.8716	13.2205	8.28787	7.30326	22.8662	11.2715	44.2372	11.2324	14.6811	9.58558	31.7601	23.8649	14.0213	11.4032	13.653	12.9596	27.2766	12.0304	14.2059	6.90884	16.2481	17.2581	22.3414	17.6378	14.7889	15.0707	14.2192	10.6344	8.41238	27.9618	16.478	29.2921	30.1199	15.3585	15.3874	7.7465	30.2614
LAMC2	6.51391	45.0404	27.917	3.0811	5.67687	1.45534	15.6704	2.31856	30.03	2.64216	5.58601	5.33441	10.3852	62.5195	26.2747	381.879	43.9994	70.7947	7.87407	474.554	79.4543	24.2949	78.5907	57.9941	4.96832	78.0314	152.563	41.9737	24.2877	18.1073	74.4522	20.4649	6.50237	32.0511	7.85837	24.6836	65.2483	45.339	165.631	5.06934	30.8009	37.1299	13.0681	44.1416	14.1744	96.6851	35.9721	214.473	18.311
NMU	0.541404	26.5073	2.45746	45.0146	1.28703	0.142316	1.93651	0.197231	8.96062	0.129277	2.25114	3.61452	6.08355	5.83487	16.4481	8.65496	2.31298	1.83379	9.26628	1.7048	8.04618	7.52706	7.4458	8.79289	27.1984	12.0807	22.218	2.30948	4.72499	16.626	10.8121	22.1003	4.64291	7.04187	2.13505	0.899522	28.3592	16.8659	3.26821	1.50237	4.2352	3.77805	0.552487	1.63166	40.5729	3.4475	28.956	5.04861	8.59135
CLDN1	1.42507	31.2418	13.9208	17.5647	2.64469	1.20272	5.13209	0.215825	27.4388	1.19378	11.4803	63.3009	115.569	50.5143	44.5144	59.3323	24.0939	118.149	29.2461	140.344	122.417	36.0584	59.4201	20.4606	23.2927	127.074	127.388	78.5089	3.06137	201.716	37.5964	40.5171	377.644	37.4497	10.8504	47.8861	59.2299	129.584	83.3108	4.37125	29.1212	17.7885	57.6808	4.70845	104.005	106.639	175.922	15.3985	0.479724
ZKSCAN3	1.87755	0.822943	2.00594	0.720605	3.50386	1.53674	2.1913	1.29294	1.83269	2.01646	2.24678	0.689691	1.94658	1.56007	1.03121	0.532919	1.10983	1.01177	0.711434	1.1676	1.84495	1.93443	1.31431	0.922297	0.534383	1.17474	0.388266	1.28091	2.38556	0.595177	1.27782	0.40622	1.39237	1.40726	2.23251	0.775924	0.599134	1.79904	0.893132	3.05651	1.30104	0.644279	1.3564	1.14473	1.74147	0.816283	0.361886	1.34038	1.23882
SBSN	1.7129	528.28	1.06881	675.643	0.0505481	0	0.155006	0	0	0.00976416	5.39771	6.16038	1.47286	36.6686	273.327	19.7001	0.138105	38.8499	71.4014	2.42022	3.03859	2.26778	0.21542	0.526433	0.800234	168.482	61.272	179.752	0.0735506	126.95	11.2087	142.896	13.981	201.479	0.0149739	0.0895152	124.728	62.6554	96.4655	0.220423	50.878	2.9996	0.187779	0.400521	121.864	74.6569	352.557	20.6067	0.126401
OLFM3	0.0218054	0	0.0322834	0	0.0335898	0.402377	0.0595128	0.0476616	0	0.0865119	0.141912	0	0	0.00263281	0.00386732	0	0	0	0.00281467	0.00236161	0	0	0	0.00333162	0.0117193	0.00299248	0.0500371	0.0264361	0	0	0	0.03375	0.0728985	0	0.0398013	0	0.00808891	1.48093	0.461777	17.1524	0.158516	0	0	0	0	0	0	0	0
ACTG1	549.115	2227.25	689.937	1605.01	768.027	565.617	1410.13	562.677	422.001	805.857	540.101	1356.73	1828.87	2386.01	989.677	1907.91	1082.55	1414.37	1328.21	1950.32	1362.56	1751.1	1587.14	1342.01	1460.25	934.829	1328.99	798.033	928.174	1228.4	1201.16	2323.92	1250.99	1775.92	1128.27	3181.34	1976.52	1175.42	2349.22	1023.3	1046.05	1890.84	950.959	1445.45	1066.94	1321.38	1919.78	1417.42	2270.77
HAVCR2	0.277534	0.210479	2.48144	0.326978	1.72416	0.282696	0.339888	0.393183	0.20014	2.30926	0.250864	5.83371	1.36093	0.462311	0.209651	5.11503	3.50362	2.49736	12.1007	3.58192	2.8139	2.74058	4.16831	0.985503	2.16835	7.94197	4.75118	8.12794	0.856603	1.0031	2.55908	1.02419	1.38093	0.040917	1.71987	1.52042	0.958042	1.17374	0.831974	0.699324	5.57403	0.403092	12.5432	1.79897	1.6162	0.658149	0.97603	2.66294	3.09119
PLAUR	2.44768	2.72386	7.59478	0.728487	3.53624	2.71243	4.25927	1.29437	3.72998	3.48066	1.09553	5.4624	2.05483	5.22749	13.9841	16.3228	17.7823	7.49893	14.7443	11.656	10.5721	23.8535	29.8827	9.30254	4.77401	11.0284	26.4754	13.0795	44.5039	5.28647	21.121	10.7046	4.15501	13.2006	5.43454	18.5848	6.38684	2.0592	10.8725	4.46894	15.4141	7.22473	10.0221	35.5663	3.37074	6.80569	10.285	10.6064	33.2811
NME1	2.46801	10.3336	8.04504	6.11749	3.18764	1.81621	5.1874	2.66617	4.22563	2.28153	2.67856	29.0419	15.0851	10.773	9.26869	12.3368	15.3232	19.3426	6.77521	12.7643	10.7676	25.3599	14.7812	26.7043	24.6681	14.4533	16.7092	13.6967	10.8245	11.386	11.7222	10.0559	11.3856	16.0669	7.45184	20.932	15.9427	9.10782	12.4999	11.6947	16.2677	34.6807	13.324	11.6785	15.6513	17.1265	15.2367	11.0874	27.1547
LPCAT1	1.67087	7.43196	5.78203	1.35566	2.98095	3.27184	3.75755	1.38189	11.1644	9.20013	2.99776	5.85572	17.7581	11.3213	6.41268	48.441	25.2801	11.3782	6.30521	20.9036	4.36145	2.74927	20.5072	4.39974	10.8368	10.6822	45.4344	11.3472	8.45575	15.9347	10.9826	5.40917	4.26262	4.78828	12.2222	7.17241	3.03212	11.2006	8.88239	7.0184	7.92912	9.66192	7.53885	12.4024	2.26793	17.6449	7.09474	13.8768	11.7596
PYCARD	1.7538	21.1199	22.3833	10.406	3.15288	2.01538	3.4843	1.64656	8.76891	2.93034	3.24607	22.6347	12.2575	14.8584	21.2722	24.5064	6.68458	18.9164	34.1549	6.73725	16.4027	16.0422	31.1822	56.9462	18.2664	21.185	75.7239	22.3644	16.6616	21.4788	22.2082	16.2065	18.0355	26.4256	14.7796	5.57984	20.1071	23.5251	16.1631	8.38297	17.5411	55.6546	38.5178	25.1075	11.7473	17.7525	29.2284	11.425	10.5316
SATB1	2.55592	1.75244	4.73703	1.38659	3.79574	5.34481	3.30287	2.84592	0.615247	3.63566	3.90355	1.15687	2.17193	1.55535	2.78243	0.591182	3.13107	1.43206	1.70514	1.27592	2.68551	0.915306	0.644099	0.757421	0.728765	2.20504	1.35344	1.44752	0.330996	1.57209	2.09395	1.41797	1.82158	0.306961	4.21378	0.615173	1.66588	2.76938	1.05483	1.30838	2.72143	1.71661	2.45053	0.442553	2.01536	1.35451	1.12949	1.5248	0.518282
SPINK1	132.205	1.49715	423.445	0.993226	297.209	43.9245	381.834	90.3753	10.887	0.262049	67.5954	0.0311946	0.0235288	0.0637994	34.6041	0.298438	138.456	0.781221	0.733219	0.0357673	0.82886	98.8589	69.1331	0.0201833	2.22753	0.589186	0.187652	0.382587	16.9455	0.351577	307.486	48.6448	0.0817827	133.271	201.717	143.255	0.0857562	1.03519	0.234345	2.24113	1.06412	37.8458	184.939	169.64	2.44944	0.0861474	0.662353	0.0814819	0.973064
PLAU	2.53165	12.1693	3.94659	2.79813	5.38242	1.99906	2.39316	1.65139	1.89117	7.05987	2.01641	35.9485	11.2613	23.9419	6.14736	184.528	27.1831	89.5348	46.6146	170.865	59.5382	12.013	20.8429	22.4136	23.8112	16.9851	156.811	60.2965	22.4497	33.6261	20.17	17.0235	30.7602	7.25773	13.7703	57.4993	23.921	6.40033	204.413	238.245	54.4088	4.98276	11.1317	25.513	27.4935	86.3726	93.7665	121.184	166.407
PTEN	7.46689	7.20884	11.1084	9.06439	8.9439	9.79678	8.5579	7.87647	15.3041	13.778	8.75706	6.95437	6.97529	6.3913	8.09475	2.109	10.3186	12.6883	7.67565	8.66433	8.28787	7.36079	12.1463	3.43359	8.46383	13.329	8.88739	10.8748	6.44385	6.79794	9.5469	5.83933	8.81374	8.51663	7.53909	10.3741	7.10513	9.95808	11.3347	9.39875	13.3037	11.699	11.6631	11.3008	10.3215	8.45998	8.9469	8.56586	9.01813
SERPINB5	0.590641	320.946	7.22183	107.309	0.310077	0.17173	1.53699	0.113912	55.5507	0.0467683	2.49535	54.1616	43.0709	71.123	97.1834	186.213	80.7176	59.217	40.8177	50.2747	30.7937	42.4421	119.436	119.201	32.0941	55.5412	75.2711	19.4028	23.6136	127.264	14.1197	112.362	179.069	59.3599	5.54524	7.40174	173.06	24.4112	128.518	0.966016	70.3592	35.2766	6.04349	0.69236	96.5275	112.517	162.606	89.2572	21.8795
SLCO1B3	0.0386378	0.0262846	0.208841	0.0729692	0.146435	0.00979377	0.0231765	0.00603238	0.0669498	0.00273738	0.0224517	0.0304137	0.00327712	0.049984	0	1.69658	1.92154	0.0336523	0.18881	0.104616	0.812767	0.0303955	1.10972	0.0463841	3.25579	8.29082	4.13457	0.037177	0.0190338	0.282508	0.0474676	0.0142388	0.0205034	0.117183	0.0251876	0.0133843	0.593797	0.0247168	1.14137	0.009507	2.53226	1.15442	0.146233	0.00356464	0.0834184	0.733011	0.0518924	1.34949	10.4557
EPHA2	7.00422	63.6591	19.9781	93.6899	7.26142	5.01284	17.266	5.11177	24.8477	5.13815	8.47823	9.56144	7.97095	29.4576	110.176	40.7224	57.4623	17.8494	23.0823	24.2697	10.0594	49.0242	75.4917	29.5912	5.40031	30.74	112.594	11.0943	75.7279	82.8391	88.1684	191.546	21.8358	64.6529	6.24938	84.0769	63.2568	51.1761	22.3258	12.8372	34.2192	60.0745	22.6411	20.1001	60.2144	33.6937	92.4008	34.7052	56.9184
PLK1	0.579128	4.30686	11.4761	2.73525	1.74696	0.473702	7.07087	0.529678	8.26464	0.523493	2.28882	20.0449	10.3541	12.1476	8.77787	27.8229	39.3103	13.8428	9.64655	9.55509	16.2276	7.871	19.706	22.7737	16.8154	8.93132	10.1207	13.5831	26.5752	21.3274	8.80212	6.90021	5.05005	18.4823	6.18816	12.7282	13.8803	11.066	26.3424	9.98895	16.4624	28.359	6.63768	13.5013	12.0828	24.4769	21.4771	15.6384	20.6983
BRMS1	6.80464	15.176	12.4795	6.9202	6.53551	4.13266	8.53074	6.73977	8.77731	3.91072	5.76976	16.7054	8.36169	9.68551	11.8271	15.2112	15.3305	14.7692	12.3672	15.8891	10.007	22.6756	11.7794	24.1026	20.4226	35.0858	33.4686	14.9699	13.0464	14.6952	15.2949	18.5215	7.72258	17.5144	12.6452	13.9261	26.1656	9.83192	17.1329	9.54359	18.106	19.6089	13.5567	24.3831	15.116	18.9537	24.4388	26.5616	22.1991
LGALS1	17.5939	26.9389	19.5485	22.3269	41.1054	92.1845	22.1474	18.7031	7.65432	183.091	22.3594	142.593	51.0669	94.9172	20.0348	157.037	87.2011	185.856	142.107	277.683	320.856	68.786	67.0666	151.382	243.817	333.6	111.901	165.626	41.9494	50.8424	86.054	42.7586	29.6484	33.0621	50.9121	74.6588	16.3165	91.1583	381.811	54.3254	73.9061	39.259	270.261	107.625	25.9235	51.8683	54.0203	284.53	291.884
PAK6	0.0454175	0.775715	0.151916	0.585401	0.0673714	0.0214896	0.0858161	0.0595633	0.0367255	0.0105112	0.0763589	0.209735	0.357737	0.482572	0.222857	0.237616	0.0802349	0.380277	0.386929	0.191837	0.329404	0.0444627	0.0766103	0.434862	0.0711948	0.213997	0.309352	0.116243	0.0574255	0.588886	0.0911346	0.322192	0.38053	0.182129	0.0759919	0.141333	0.438049	0.174	0.114142	0.172098	0.220111	0.229284	0.00962596	0.228781	0.408314	0.664174	0.35677	0.280145	0.173926
TNFSF10	4.54851	6.97514	33.995	11.8326	8.24287	2.85167	6.07469	3.32835	20.1965	5.36857	2.77063	44.6171	133.522	90.2737	33.042	50.3859	9.30135	29.1488	49.7824	44.8542	37.8879	21.0744	27.84	19.0599	23.3266	56.1836	63.4629	139.033	11.5177	113.408	40.2971	29.3374	43.1424	14.7845	11.4354	10.4663	39.2488	6.86916	39.9116	1.59497	52.0828	10.7637	76.6391	119.665	93.7535	14.3474	39.1809	14.2933	7.7493
MGAT5	7.37995	7.37595	20.9735	5.60045	10.7219	10.4133	15.4483	9.43791	42.0491	9.80207	9.36711	4.40259	16.6143	15.6074	14.0044	11.3361	15.9197	14.5793	8.30818	16.989	11.7266	5.3843	17.2099	3.95765	5.96393	4.97326	3.5502	6.77747	20.3164	8.24186	11.7052	5.36939	10.9383	24.4474	11.5288	27.2697	5.44911	18.4235	5.85261	7.62744	6.82672	24.5203	7.71923	6.15548	4.51758	11.1394	5.82535	8.10021	9.97464
MUC1	134.372	42.6283	193.153	19.6192	231.935	73.935	269.633	79.6868	214.556	11.8767	86.5981	5.42884	15.6187	7.41653	54.8527	4.62028	99.878	7.23973	4.57165	5.88946	1.32128	54.9184	300.371	12.0131	1.79042	11.3818	56.7329	11.9258	195.254	6.58751	198.819	86.0593	7.39009	12.8836	124.138	46.8645	36.1434	4.92147	19.3401	36.7185	5.78994	148.913	78.4852	896.898	22.0899	6.67137	3.73035	6.48671	27.7269
RAD9A	1.75389	5.07372	3.50621	2.56504	2.64476	1.18572	2.69764	1.41966	2.49677	1.12331	2.38057	5.35249	3.17684	4.03716	3.32688	3.19511	2.98732	2.53604	3.57147	2.65376	12.2255	7.83763	5.59282	5.33442	4.94313	11.0598	6.30809	3.42705	3.55496	6.41653	4.75879	4.24012	2.59555	1.66347	6.35209	4.01978	5.07537	6.17036	3.90746	3.81647	7.02091	4.69263	4.14465	6.61432	4.604	5.22403	4.67333	4.17852	4.36394
E2F1	1.7887	4.33699	3.72626	2.54275	1.22327	1.26812	6.53481	1.16949	6.96594	1.09625	2.17317	13.3604	17.4183	12.6706	6.55946	12.6915	11.0553	10.6672	9.54808	7.65588	12.5963	5.77087	11.9594	13.7482	18.66	8.48975	6.53365	7.37056	7.98165	12.1905	8.22851	6.85077	5.55626	24.8463	4.5029	10.4266	6.75849	11.5832	5.81544	10.6484	8.15667	21.8568	7.1351	7.01666	9.44818	16.5317	12.8263	13.9063	21.848
CASP8	1.63575	3.25973	14.8419	3.10894	2.97992	1.5326	3.08564	1.77884	8.04716	1.92899	2.01802	3.89886	4.73726	4.8235	7.06605	3.31386	9.14575	2.98526	12.5433	3.58994	4.67667	8.43291	9.53569	2.81062	2.58953	4.13776	7.2411	7.51943	2.83893	5.13192	8.2684	4.39894	3.37898	3.97078	5.09117	11.4329	4.85387	7.31473	4.01635	25.0915	4.7916	5.89117	8.87599	4.39633	6.55522	2.70445	2.78804	3.32538	7.375
CDC25C	0.0449147	0.378878	3.12432	0.418816	0.400852	0.0740013	1.05072	0.0560989	1.13872	0.105009	0.626379	2.80816	1.77142	1.65403	2.10527	2.35367	3.6106	1.16967	4.02523	1.12577	2.25974	2.63234	3.83491	1.70581	3.14243	1.14913	2.2962	2.15219	4.99308	2.03172	1.48432	1.74209	1.4102	4.18309	1.52741	2.38436	1.54714	5.05208	3.0093	2.17161	4.0026	3.97384	1.37351	1.72794	1.93194	1.68136	2.19976	2.18397	4.89117
TSC2	8.13075	8.65452	15.2999	12.223	12.2571	12.7953	11.0355	9.72942	11.8456	14.5398	12.8829	6.77651	11.4666	10.4985	6.73003	8.10533	8.67951	11.089	11.5017	8.87733	32.9993	6.52329	8.78318	9.77849	9.36098	7.90491	10.5886	12.5808	36.0033	11.2724	11.505	10.6686	8.47846	8.24825	14.0107	13.5985	15.1852	20.8457	10.7858	6.17398	12.4639	11.0431	10.7401	9.36757	13.8963	7.73028	13.0876	10.3518	4.81396
CDH2	10.2849	0.0752325	0.133194	0.094637	7.26043	6.73468	9.9753	10.2949	0.0100855	17.4309	16.8141	0.519196	0.274361	0.219367	0.0560394	0.197245	0.597189	1.97698	0.968669	4.84868	1.50491	0.155873	0.261989	0.356042	1.66635	0.818469	0.943013	1.24498	0.049939	0.107813	0.295502	0.0280188	0.312988	0.429736	0.270347	0.32802	0.117212	3.16879	2.27279	0.221091	0.547085	0.00356058	0.66131	0.0867237	0.04362	0.491728	0.0866411	5.13158	0.242892
JAG1	7.46611	38.6408	10.9573	24.9458	9.99102	12.3653	20.8955	4.47413	9.58367	13.0554	7.58526	16.7292	34.1943	50.8767	18.3652	68.3974	25.2602	69.0206	28.0339	82.6239	31.6597	11.3582	19.2287	76.9325	11.7862	55.4265	38.0732	30.6844	12.782	63.5514	33.8546	14.2558	27.3209	16.7613	8.10186	16.4125	29.7571	34.2193	39.9425	4.37594	21.7448	14.1098	21.3106	10.8313	49.9429	75.3846	56.6542	270.303	35.0014
CXCL8	0.111768	2.26814	11.9792	1.76169	0.559186	0.343234	0.433198	0.836251	0.817787	0.409322	0.4826	5.10948	0.413462	40.3447	17.5812	81.8596	103.67	1.76646	0.771296	7.21637	5.29446	3.85067	169.571	16.3412	8.12093	5.36848	26.1124	7.63217	9.03249	18.2762	32.6058	39.2559	1.62343	54.864	9.08231	174.322	15.2848	5.00489	52.2762	37.8349	125.617	3.91405	6.63276	66.1225	17.521	32.188	60.8635	94.0776	98.6619
PIK3R3	1.79413	2.91739	4.30338	0.65399	2.14054	7.71035	3.32906	1.7474	4.91318	10.2035	2.61217	1.25025	1.73878	2.48641	1.48571	1.07136	4.85984	1.25631	1.4304	1.07586	9.08647	1.66359	2.12902	2.30989	1.72467	2.03493	1.96769	6.66935	2.67487	1.73931	3.02907	1.64369	2.57431	3.26281	2.96579	2.28719	2.68177	5.74392	1.37492	6.61206	10.3625	3.81039	4.69726	1.4841	2.8142	0.872825	3.52888	1.19395	3.60528
WT1	0.0142602	0.00452712	0.183757	0	0.00406794	0	0	0	0	0.0117868	0.0270687	0.0935408	0.0846649	0.0545235	0.00421522	0.664113	0.0395171	0.113024	0.377349	0.0694996	0.0336737	0	0.887401	0.010894	0.00638679	0.244626	0.199974	1.06292	0.770393	0.0259507	0.00408778	0.00613102	0.017657	0	0	0.0201708	0.00881658	0.138355	0.126488	0.401171	0.382909	0	0.488615	0.00613953	0	0.0338169	0.00595844	0.05864	0.318019
RAB27B	11.0801	27.8824	10.2214	11.1197	16.7607	5.40974	40.5788	9.15386	20.0211	0.275271	8.99675	1.13267	3.34545	5.20427	18.3146	5.93056	14.4981	5.50594	5.88634	3.96447	11.429	12.1828	10.6801	8.85047	1.25477	6.70765	5.73324	3.35935	11.1229	5.06066	18.0301	16.2475	11.257	5.14267	1.95267	2.53876	12.8178	2.32846	2.22982	1.43404	4.84806	6.45043	1.95419	8.31254	21.6319	2.82282	4.28511	5.34728	5.30303
LCK	0.983684	0.395934	4.30072	2.13349	2.03944	0.342844	0.571613	0.780693	0.583113	0.238112	0.666868	4.6274	1.0742	0.848367	1.31366	3.75959	5.41232	0.62829	4.72001	1.95952	2.76135	4.83114	6.28636	0.581502	1.38857	6.37217	2.48569	4.81923	1.67921	1.0389	3.38376	1.75212	1.08025	2.40328	2.82775	0.898026	2.68793	1.49014	3.44402	0.297507	5.14235	1.4727	33.246	3.08559	1.73577	0.524169	1.29178	4.41936	29.7879
RAF1	18.2751	16.3848	15.1749	16.5509	18.8636	15.9567	19.3066	17.1434	15.9498	13.6176	20.0923	11.1316	10.4434	10.389	11.4447	9.51705	16.736	11.4503	8.98726	9.00721	10.5686	8.4721	12.8686	7.74477	10.7492	12.0151	10.4054	17.511	14.1473	10.7779	11.238	16.1289	21.1536	16.1372	9.79082	8.37949	15.0628	11.0656	8.79425	12.3182	15.5079	11.0484	13.3202	21.0025	10.9775	11.0531	13.979	8.19956	9.26894
LTB4R2	0.114897	15.2105	0.263618	4.40188	0.522696	0.348719	0.438005	0.270966	0.552045	0.404867	0.550986	3.4939	2.12189	4.38091	5.03009	2.07085	0.540439	4.39475	1.44018	1.55221	1.62484	0.715963	0.55827	2.25444	8.47461	3.57686	1.01762	4.00379	1.5605	8.97988	0.748864	5.32339	4.3466	1.28383	0.910634	1.05211	4.89035	1.80077	2.8127	0.692641	1.33071	0.801378	1.34576	0.660002	3.92631	4.16234	5.09395	2.71278	0.478142
SMAD7	4.95122	3.12183	6.54641	2.07826	6.77958	6.76502	4.99172	3.72702	10.1652	10.0451	4.58362	2.28422	4.63422	3.42706	3.70975	5.04667	7.87741	4.18415	4.85998	6.81051	12.0606	2.37173	4.58808	8.65314	2.93497	5.11976	1.80247	7.20822	3.10428	3.17647	3.23328	2.64668	4.3701	5.78037	5.0745	2.79923	3.11847	5.01127	8.4958	3.75319	6.59627	1.50375	7.95734	2.06557	2.36086	1.89621	2.50248	9.26156	5.61127
CSF3	0.00880663	1.68587	0.449101	0.698532	0.0678301	3.8596	0.277335	0.413859	0	5.08812	0.0573146	0.0207964	0.11503	0.281781	0.257715	0.230374	3.75219	0.0375845	0.1762	0.205066	1.98303	0.0969918	3.06536	3.43117	0.496978	0.477391	7.1404	7.59242	0.0809821	2.04335	2.98394	0.76673	2.00095	1.8307	1.49361	12.5191	0.873896	0.289195	4.11568	0.894934	14.3614	0.127026	0.205316	1.77446	0.936775	1.46712	1.45718	7.62473	4.52906
PCNA	12.1478	38.7464	42.4264	29.6496	13.3078	10.7771	48.2027	10.1677	58.1705	11.4425	20.7271	234.209	76.0134	56.7679	78.0586	70.1196	76.861	134.844	101.898	49.7184	171.837	110.93	126.861	168.313	249.099	105.134	88.264	84.1469	89.4089	196.401	54.9538	43.1224	65.1518	217.113	68.4928	85.2347	72.4266	129.525	89.618	81.3001	150.15	117.886	86.5632	190.351	109.871	115.08	176.322	145.493	179.977
PDPK1	3.12425	3.38453	5.44855	3.54089	4.46845	3.6258	4.80855	3.39098	7.43186	3.73865	3.8037	1.5564	2.68782	3.29371	4.90951	3.82446	3.87981	3.75176	3.57781	2.38467	4.21936	3.68362	5.12584	3.51315	2.16743	2.67177	3.18321	3.39266	7.3952	4.12492	4.40561	3.51158	3.90057	3.48544	2.91367	3.88118	2.84266	3.96363	2.86684	3.54429	3.34869	4.56511	2.3684	2.98719	4.43916	2.01135	3.33983	3.35934	7.00155
ETV4	0.124665	6.24109	17.922	4.11564	0.347895	0.442395	1.08673	0.473894	6.65392	0.231173	3.61573	37.7843	23.3921	7.9155	19.13	12.8318	18.9311	16.4767	12.2614	14.6494	1.25066	14.8592	8.56584	11.5113	19.2228	4.86849	5.215	6.51651	21.0489	20.2662	7.11769	5.44257	8.67436	32.8097	15.7142	15.407	7.71096	33.3894	10.2555	1.98383	10.3352	23.2539	1.13155	17.278	5.36859	31.7323	15.9802	14.5738	15.1939
NOX4	0.0513142	0.0213813	0.187292	0.0158992	0.0576378	0.10243	0.0235662	0.0490705	0.0450425	0.314923	0.0286996	0.691712	0.255153	0.435638	0.130825	0.310796	0.37494	0.99526	1.09705	2.43837	1.037	0.147174	0.309236	0.30626	1.23889	1.24778	0.741202	1.89011	0.11428	0.186034	0.23995	0.165465	0.494399	0.0964575	0.443926	0.311071	0.0713831	0.253718	1.11123	0.499914	0.81601	0.0780629	2.549	0.343817	0.0894815	0.268093	0.253272	1.42253	0.296929
TPM1	5.2226	13.9725	9.34052	8.24876	10.1725	73.4973	9.06537	5.22194	8.68425	76.8338	8.06954	6.93703	6.3009	5.1607	6.70616	3.97309	15.1026	16.2268	13.9222	16.9926	12.9323	18.4879	14.7405	12.4727	8.75103	5.80771	3.99239	33.3651	10.1299	4.11941	23.2545	3.44885	5.24287	16.6976	10.3341	9.4249	2.23375	15.2266	14.2977	11.2556	3.37938	11.8049	13.5883	21.772	3.36776	4.99185	2.94273	28.8021	12.5004
HTRA3	2.47843	1.53625	1.28801	0.924172	9.64287	16.6136	4.29489	5.15348	1.27026	29.5137	4.12347	39.0178	6.37874	15.1437	1.16417	5.91495	16.3433	47.1761	14.4686	89.0644	63.6109	3.27424	9.78258	7.22722	48.8873	50.0983	40.2052	51.2053	6.9292	13.2013	8.16604	5.5506	13.1717	0.968604	21.7955	13.1294	1.44679	9.6264	21.0633	9.33862	14.6316	4.05462	78.7307	6.00693	2.0155	12.746	15.423	37.537	6.27393
IL1RAP	0.524374	5.49998	0.70261	2.41087	0.951077	0.51473	1.11865	0.617449	0.883314	1.6677	1.22747	4.09166	1.65507	7.3883	3.86704	11.9633	3.35038	6.54663	2.0328	11.2164	2.69704	0.566652	1.99999	4.36776	1.78982	5.66999	8.87772	21.4224	1.29978	10.2517	2.28965	4.20318	7.84792	1.42149	1.6454	4.67387	2.34367	8.57443	4.75437	0.887149	4.10279	1.68959	1.1544	1.31197	4.93187	6.64778	5.75146	5.26335	1.30659
TUBB3	0.017653	1.57198	0.192388	0.0510496	0.0528759	0.219257	0.180674	0.00964636	0.0366255	0.223245	0.0251318	0.166747	0.102189	0.151866	0.336569	0.645452	1.59828	0.855632	0.316167	0.590297	0.174186	0.170119	0.0694129	0.81927	0.939868	0.196838	0.761947	0.282386	0.339878	0.147574	0.21633	0.185	0.136612	1.96756	1.39964	0.770501	0.658948	0.0494058	4.536	0.98437	0.91045	0.684306	0.224487	0.153906	0.0718276	0.204081	0.342988	1.17302	2.93771
NTRK3	0.0160791	0.0174019	0.0372712	0.0144929	0.445338	0.51937	0.193336	0.094253	0.00559889	0.159845	0.368635	0.0149579	0.0815784	0.00926583	0.0032406	0.00173808	0.0094938	0.0138134	0.121229	0.0106861	0.0236689	0.00536627	0.00299877	0.00614177	0.00245503	0.0481446	0.00159727	0.0644868	0.00378043	0.00648391	0.164045	0.00707016	0.17873	0.00129303	0.0528061	0.0239251	0.0196564	2.76005	0.0360606	0.0276943	0.12493	0.00197662	0.142511	0.00188799	0.0118952	0.00606618	0.00274845	0.0209015	0.00246958
PBK	0.352184	2.43393	4.8205	1.83546	0.888737	0.256366	6.85356	0.187514	4.1795	0.582197	1.73374	36.8065	8.90002	7.13626	9.69762	18.5062	21.1988	5.81393	14.9437	5.11018	17.9762	9.53118	28.5114	12.4452	60.7945	6.12209	4.697	6.75739	14.2153	12.2388	4.76046	5.0492	12.8865	13.7555	4.01088	21.6891	7.21902	13.6139	11.1588	11.8675	17.5561	16.7212	4.85181	8.01879	7.19117	16.3127	8.56898	26.3467	22.8971
LAMA5	4.00563	42.5729	8.64855	11.9397	9.22565	26.7363	9.99499	4.52422	22.2194	60.8331	12.97	18.9193	45.9746	38.1887	13.3823	36.431	33.1144	59.7	25.518	28.035	31.8439	9.00124	15.9544	30.5601	11.2356	23.0307	34.2883	13.673	8.55909	42.7555	44.0544	18.6634	21.7532	21.3725	13.8057	41.952	37.3956	50.3835	32.9302	33.0576	16.1326	58.6772	25.9069	7.53352	20.1527	38.6263	22.1328	56.0318	11.3327
ATF4	79.0349	90.1524	64.3805	52.0589	107.709	92.2571	76.8828	133.954	63.9582	72.8227	79.6949	97.7841	118.592	77.3996	75.5623	31.1159	84.7056	89.3263	134.002	73.8108	96.1621	117.025	83.1527	55.1919	188.171	66.9538	69.7371	70.6489	48.391	83.3736	94.157	73.2283	66.6819	85.3844	70.8973	70.63	90.2238	87.4078	70.5146	66.1086	124.756	81.0645	91.4768	46.486	43.879	78.5348	117.188	43.839	83.3675
S100A11	179.751	2400.67	677.353	2316.04	198.956	85.3209	427.266	97.3127	419.045	168.964	150.324	1870.78	764.068	850.225	2304.72	796.749	1002.33	1285.41	1085.5	1121.77	766.012	1619.16	893.065	1408.48	889.703	2029.1	4608.63	1409.57	519.297	1296.26	843.471	3557.79	1605.52	1667.65	545.127	672.956	2103.02	654.157	1256.62	557.178	769.518	1995.29	959.957	811.552	1475.42	1559.5	2640	866.675	1772.23
EIF2AK3	9.32203	9.17295	7.15554	3.50182	12.9935	7.57437	14.5631	9.53912	14.293	5.59731	8.81584	4.33303	8.82422	7.07218	7.1882	4.01065	7.84778	4.99248	5.69142	6.54827	4.75709	7.41976	6.38214	3.6281	2.46784	4.15247	3.13139	6.16967	9.63167	6.08905	10.7611	5.64294	5.19213	6.66119	4.23307	11.1604	7.34728	6.87402	4.28831	3.18829	8.928	4.38189	6.12703	9.51245	6.29274	6.10892	12.788	4.65838	7.88747
COL13A1	0.407236	0.15514	0.510809	0.157021	0.505341	0.273976	0.18168	0.493277	0.147318	0.36353	0.339575	0.365968	0.249842	1.30711	0.361129	3.18175	1.48293	0.69933	0.284736	0.43554	1.008	0.302121	0.343463	0.744061	0.736403	0.845297	1.18109	2.70631	0.885482	0.481707	0.636216	0.833851	0.155474	0.0600391	0.681382	0.707693	0.314725	0.149432	1.96977	0.680958	0.846791	0.146848	0.769608	0.394493	0.333369	0.700152	0.367967	0.936262	2.47687
SNAI3	3.22835	0.107506	1.1977	0.615551	2.93669	2.27325	1.61149	2.68934	0.34589	0.45904	2.46102	0.6042	0.864535	0.354359	0.350347	0.187907	0.662757	0.68132	0.67025	0.317858	0.908177	0.352239	0.640688	0.534648	0.432253	0.882993	0.585892	0.866722	0.27896	0.500706	0.795998	0.291188	0.433279	0.0898663	1.21906	0.424256	0.649042	0.775051	0.356693	0.466612	1.15326	0.824257	4.0671	0.656083	0.321503	0.153919	0.47401	0.227869	0.564495
PARP1	8.31771	13.3216	16.2624	10.063	9.92123	11.918	11.4022	9.43603	26.6696	15.4871	11.8759	35.8319	45.5446	40.9257	15.5017	17.8283	42.1666	64.9986	21.8182	24.4232	64.4049	8.36728	39.5435	28.8484	46.8838	21.4693	19.653	29.5396	35.1931	36.6274	17.1226	11.6183	45.8592	24.4542	32.7	42.9337	24.315	45.1372	26.3742	29.5145	43.6686	32.3782	18.834	21.9673	25.1758	35.1069	37.2186	25.0824	16.9387
TAGLN	11.1604	73.2584	3.57578	41.1283	35.1117	288.95	25.2906	15.2845	5.12043	452.53	20.2495	26.8105	6.76243	8.28342	6.95789	9.0447	20.8976	83.9701	114.73	53.6113	41.3393	9.90854	9.47506	27.3166	46.4483	23.3578	6.88026	58.5622	8.77501	7.9193	49.1986	3.40238	22.9438	3.59396	30.3531	16.6446	4.05026	30.6947	44.9587	19.7168	8.29145	4.21161	90.3204	6.9786	13.2993	6.29101	5.41507	115.609	11.1985
TNC	3.14686	39.528	1.09474	7.27883	9.66277	21.3192	11.4626	2.0666	1.14369	26.3073	4.36739	117.012	32.1979	63.217	3.14322	393.479	15.2744	227.054	22.2298	416.965	201.492	9.02946	12.3636	142.05	71.0412	155.799	17.6798	101.315	1.82957	393.4	15.6998	9.55054	13.0208	2.47138	6.90218	22.2203	13.9616	10.9555	198.136	19.2412	35.9787	1.56934	16.6374	11.3733	10.2414	142.522	90.8167	969.297	12.2401
PML	4.00066	5.18572	18.5175	5.90778	5.38415	5.53629	6.21342	2.77022	7.32266	9.48515	4.70849	18.7597	17.8612	19.1791	9.14185	30.2418	12.2026	9.02285	22.5516	16.1186	21.6545	7.82555	14.4322	11.1135	13.8671	19.7949	28.461	26.0064	10.6619	13.1964	14.1404	12.0257	10.9945	7.54925	6.52116	6.89178	17.9164	14.4886	21.837	6.35325	23.2623	21.354	39.2022	29.2341	11.2905	19.0862	10.6358	20.7186	10.8186
TLE1	12.9714	13.4432	11.0067	5.5283	14.351	18.9251	16.6366	12.861	25.2263	12.6583	12.5721	4.78995	2.31157	3.59909	7.05715	25.9027	9.15619	14.6117	10.8255	11.856	10.5623	3.28074	12.7754	6.99291	6.37713	5.7834	13.092	8.11934	9.40402	10.6169	13.6636	5.77223	2.99512	11.3932	12.9627	7.74257	5.57318	8.76184	5.68433	14.4037	3.60948	8.31666	7.71128	9.6509	3.31011	9.0368	8.55199	16.782	12.3155
BCL2L11	2.34327	2.31562	4.04796	2.92598	2.81705	3.14957	2.29949	3.09685	4.8345	2.77564	3.37064	2.94011	7.96908	8.5056	5.70529	4.9004	6.31961	9.23245	6.87386	8.38796	13.0057	3.33644	6.48396	6.27442	4.78584	4.22931	6.96767	11.3822	3.26895	13.404	4.27775	3.39546	7.41719	6.11715	8.93977	7.15594	7.06135	7.655	5.17667	5.91491	15.2109	4.83638	11.0406	3.69031	4.6153	7.02965	3.6882	8.53594	12.4066
S100A4	3.12811	41.2547	12.9587	11.6306	20.8449	25.518	4.56506	7.2334	4.54181	59.4897	4.94989	25.6439	25.6159	15.4877	29.2449	17.0098	37.6702	22.0136	32.3887	25.3471	21.8318	319.726	221.439	10.7828	32.7015	64.0663	33.1915	34.4811	18.9208	13.9406	33.1996	25.303	16.6147	42.198	43.8384	17.9916	10.0828	11.9576	28.18	9.34653	17.932	199.101	89.7859	41.7334	24.4024	11.9074	19.0677	16.129	18.3554
CPEB2	5.93032	6.20841	5.42671	8.57307	8.48578	5.85328	7.07731	4.48947	5.86393	6.7737	6.44215	1.94699	1.72084	1.85834	9.76168	9.50828	2.16699	5.67998	5.37113	3.14648	3.71206	0.817544	7.24827	8.92352	1.88497	5.72725	9.38837	5.94647	4.91596	3.77187	4.13708	8.60122	5.93977	5.98082	4.12489	2.8519	4.6863	7.3027	2.78172	2.33891	2.75903	1.72393	2.72221	1.98968	7.93765	4.33139	3.37881	5.43645	1.80594
DNMT1	2.30513	6.24026	6.95365	4.31047	3.60214	3.49516	7.25503	1.90197	7.71199	4.59849	3.10595	16.4717	8.65235	12.2668	6.3926	24.2031	27.1909	14.1306	10.5598	13.3884	30.9661	6.73155	15.7961	19.903	13.0848	13.8453	8.85419	19.8704	11.9772	19.9529	7.65992	6.89629	8.76899	12.5717	12.0185	12.3575	10.774	9.579	20.8073	11.2183	34.1186	12.5655	13.6225	9.94635	12.7887	19.1586	13.3118	23.4783	22.381
FOXA1	27.917	12.8872	21.165	10.5189	42.8664	14.165	29.3668	36.7075	39.7526	0.12905	27.4879	35.6946	11.6396	7.04261	9.88333	0.0671366	10.7324	8.8215	12.8749	2.50188	28.8289	8.25075	18.3353	5.11984	6.02627	4.75701	1.78923	0.13889	2.57909	15.9754	9.18764	12.4216	8.80279	11.1792	39.3124	6.78309	42.5826	4.0014	1.4943	2.4693	7.60626	12.9066	5.73369	7.74616	18.9013	10.3275	2.18483	0.162436	17.8309
FADD	2.25136	6.10891	5.91344	4.49246	3.36265	1.83717	3.53379	2.40245	8.39966	3.08096	4.77749	24.8353	17.6289	28.3244	4.19069	9.53989	12.5862	7.9378	5.64083	5.69323	53.1022	2.55361	6.46327	9.33783	44.483	13.9181	8.25063	19.8845	11.0165	37.8516	8.59374	6.23916	6.08808	24.0016	2.77836	7.3261	41.4922	35.3485	8.50121	5.3044	37.9324	12.886	6.44843	11.8853	6.96294	12.9569	67.9169	8.90262	45.8374
RHOB	99.2454	116.524	32.9207	34.7111	90.993	448.609	92.6812	117.057	74.4747	721.476	80.3421	50.3203	34.7982	80.4707	64.057	126.779	40.7191	122.282	65.2826	93.2978	67.7902	40.1988	45.9873	198.836	49.0437	45.4322	582.325	89.6674	61.9131	138.537	99.7016	49.5195	59.9477	82.3957	86.4626	311.685	161.599	81.2788	443.6	56.459	185.276	105.437	97.0579	91.2507	30.825	126.359	199.053	138.974	48.081
MDK	14.7075	26.4547	139.776	5.33303	22.3619	6.49244	11.4483	8.15359	4.09208	5.69121	23.372	134.411	99.2457	53.0754	59.9144	5.87521	38.6628	33.1536	94.7973	26.9981	134.121	143.025	69.5934	52.5401	54.8105	125.509	49.7216	48.9067	169.772	28.8771	70.8659	33.4905	58.4358	70.5946	309.834	11.8302	39.4909	149.766	15.0781	111.794	58.6942	126.592	141.377	65.0271	15.1988	76.9654	34.0376	12.5306	11.666
ICAM1	2.41087	3.38637	12.0627	2.84627	4.64561	5.31201	1.46749	2.53679	7.03858	19.2242	2.05999	10.8548	9.18645	3.9619	2.00224	41.3186	20.0837	7.23027	15.5804	27.5476	151.23	2.00448	35.0905	10.4058	4.36278	19.1601	17.703	41.3342	4.42356	3.05647	21.7989	12.7752	8.74965	1.83396	9.0354	39.134	5.56757	8.88621	23.2152	11.5759	98.0416	1.88804	59.9577	107.058	6.28616	4.94467	30.7925	32.6287	15.7934
SSX1	0	0	0.470776	0	0	0	0	0	0	0	0	0.0118562	0.00894265	0.0272794	0	0	0	0	0.126376	0	0	0	0	0.0115067	0.39464	0.0413415	0.0164588	0.131884	0	0.0411152	0	0.0194275	0	1.13252	0	0	0.321279	0	0.0167002	1.15446	0.562276	0	0	0.00972724	0	0.0178594	0	0	0
LTF	21.4979	0.3069	4.98287	1.81808	134.041	7.08575	2.98636	8.07476	0.173386	1.12323	5.01075	0.188426	1.79839	0.0277911	1.84925	0.0410527	0.913703	0.0420991	0.0921036	0.353984	24.7659	0.0295748	1.61807	0.330575	0.640176	49.2358	0.0427571	134.85	1.2567	24.4596	92.1055	8.56199	6.29275	0.158812	16.8577	0.524639	12.8631	1.8896	9.58541	0.30526	1.52401	0.331996	2.60503	2.39617	14.2433	1.04527	1.56956	7.62791	0.127549
SH2B3	1.87524	1.03882	6.60549	2.20896	6.3987	6.28832	3.05205	2.23745	2.91703	11.1599	2.25332	5.51708	3.89574	3.52508	3.49673	12.3087	11.3848	4.12845	8.93844	7.39719	44.2706	5.78536	10.2777	2.47088	5.6657	6.52349	9.52933	11.7683	4.9082	3.2122	12.5817	7.02762	4.07935	4.49554	7.15977	12.3712	1.41043	5.77535	8.05349	4.91595	9.20422	4.57837	24.8204	11.5927	2.32203	3.67387	2.3377	7.40322	9.07324
GRN	42.2173	138.693	111.852	405.358	66.0654	46.9738	54.4203	37.9198	91.7981	62.8768	40.1822	141.398	180.448	152.328	174.263	100.229	98.135	104.771	184.57	185.903	125.735	73.5224	152.789	230.989	115.072	227.256	119.244	231.384	136.259	139.563	130.745	280.19	131.279	111.725	149.046	57.7372	483.56	81.6857	127.875	61.8325	133.063	88.4097	260.226	126.27	301.16	130.91	129.717	103.006	96.5394
HOXA9	0.012909	0.264332	0.568055	1.00793	0.022095	0.0171787	0.0203263	0.00705404	10.8409	0.0448139	1.08167	0.330243	3.91262	4.27461	0.778428	2.16044	0.435981	0.385647	0.0499895	0.297096	2.64223	0.10663	5.41137	3.15084	0.628753	3.44573	1.35064	0.208672	0.964486	3.58544	0.843705	0.474534	0.807189	0.159868	13.0086	0.555615	0.490844	12.4957	0.357823	11.2895	0.304356	0.738976	0.177839	0.166734	10.8314	0.780624	0.113271	0.188206	1.55284
SALL4	0.0144428	0.123797	2.56199	0.0875101	0.0535604	0.0170842	0.0202145	0.00526143	0.159814	0.0382007	0.172325	1.1217	1.94365	1.42123	0.499496	0.111626	2.70156	0.986211	0.531325	1.59289	0.991477	1.91762	0.125103	0.353072	0.194057	0.934876	0.762793	3.86515	0.868798	0.335108	1.42834	0.20181	0.178831	5.76192	4.5951	3.6393	0.107154	0.988075	3.17067	0.924558	4.94224	0.425323	0.499973	0.0279817	0.94025	0.704977	0.419414	1.71154	1.02809
SERPINE1	10.2657	14.4582	2.43983	2.39012	17.4762	27.7353	38.1698	6.59085	0.594699	45.622	9.76226	5.21018	7.31386	23.8944	6.52183	432.937	16.2343	66.5483	80.4044	269.5	52.1313	13.4773	37.1329	89.834	5.95373	81.4927	36.8268	74.6949	3.84992	8.84998	21.3668	19.7625	24.6364	5.70331	21.3714	61.6034	18.91	9.09319	194.236	60.217	182.139	3.02772	47.2818	22.4655	7.0358	121.314	52.6249	87.9035	22.4732
QSOX1	36.7791	35.2303	34.1476	71.2918	54.9526	24.973	52.0817	34.3322	39.0873	40.5587	32.0419	8.18638	18.2497	20.31	40.9736	12.7956	45.5768	14.8756	9.70995	24.7491	13.2248	23.0677	32.5314	15.8692	7.25349	24.7299	15.2373	13.7027	58.7662	16.715	85.2245	32.7189	11.6736	16.4436	19.1281	33.2362	21.7669	26.9524	11.2691	12.5856	8.04674	63.3102	14.7616	186.5	23.1189	17.1017	17.2242	10.5156	14.5333
FOXP1	6.37966	6.14155	8.91826	4.09528	9.74813	9.14838	8.19525	8.48678	16.7156	15.8372	7.82986	3.4521	2.11999	1.60571	5.5276	3.36556	3.9566	2.73501	7.03963	5.6346	4.60306	6.64124	9.40517	3.3602	2.64558	7.14177	2.91968	13.6425	8.93262	2.74611	6.86561	3.97368	3.67521	7.73217	8.68382	6.48162	5.41358	12.1243	5.78109	3.41729	6.7309	6.03058	7.43717	6.3732	4.89989	2.0072	2.52659	5.82823	4.97737
CCT5	7.98569	32.3164	25.4857	18.2008	10.3902	8.57287	16.4702	7.72479	13.2397	11.4527	9.98034	44.0885	27.4574	25.6777	32.7444	53.0269	66.1398	60.7374	30.3277	70.478	41.2928	18.5581	41.5328	47.4289	44.4083	35.621	158.45	30.6278	29.4406	62.8913	41.1299	25.4047	27.1305	25.235	20.6777	26.4337	32.4991	48.1042	48.4491	48.5441	38.3992	63.9252	19.2245	23.9588	31.5137	68.9052	35.0838	48.4089	50.1427
RAB27A	18.4171	3.20577	10.4231	3.0405	22.818	12.5761	25.2681	16.2318	5.85632	12.5933	14.5428	4.72525	3.83329	2.93967	5.39757	4.10811	7.57573	2.99852	7.06213	4.30473	4.05951	3.6047	9.1428	4.40475	3.00651	6.59396	5.98787	6.73558	2.97295	4.13944	14.1823	7.11067	3.43788	5.3441	8.22907	8.32692	3.96592	3.79813	3.15002	3.88405	6.41805	5.88648	9.27424	15.489	4.62473	3.02951	4.05536	5.22235	3.4109
CDCP1	5.9881	48.0452	30.3104	26.3293	10.6477	3.18267	11.4173	5.90728	24.954	1.07433	4.05992	7.99385	22.8691	37.725	32.4549	79.3631	29.8007	17.1349	14.218	30.7851	11.2444	10.5946	48.1135	32.2975	10.1935	14.8564	33.2796	42.811	22.7281	21.7526	17.3841	45.2021	26.6965	28.8052	20.6389	20.8021	37.3549	9.59291	28.4345	16.6454	18.0049	21.9613	15.0125	47.2789	19.9759	29.5495	35.5139	18.4992	40.6418
NNT	26.0265	4.69735	5.22307	3.99284	27.7098	14.9529	24.1768	16.8212	7.15398	7.93187	24.9249	8.487	15.2778	11.9675	11.3275	6.09012	8.39405	14.2125	5.73902	11.2407	4.2775	3.30143	9.54758	5.41995	6.62695	6.42698	3.11318	8.4854	9.92253	11.4049	15.8465	3.61814	12.0304	4.4426	12.5211	7.42301	4.03969	6.28421	5.82871	5.56261	7.21192	12.533	5.00555	5.28008	6.28371	16.2102	5.09313	8.63878	6.93222
LGALS8	2.47454	4.70199	8.21094	3.49023	5.04011	3.22781	5.45301	2.15867	6.48079	6.43459	3.34312	13.3004	8.83896	7.47193	10.2666	5.39153	5.94228	11.4851	9.99319	8.18075	11.8561	5.53273	8.06578	6.11732	13.524	9.08814	8.40787	8.55181	4.40077	12.1314	7.70872	4.92002	14.6979	7.74769	17.5259	7.40402	5.63732	10.3491	5.74963	11.2951	7.24731	4.61405	7.71974	6.14264	6.77636	10.7432	6.78676	4.8865	5.6931
LTA	0.0337663	0.0321589	0.499919	0.827672	0.154118	0.019971	0.0118151	0.0246018	0.0718529	0.0390735	0.0457824	0.531583	0.173746	0.0611549	0.119773	0.48849	0.269018	0.102933	0.740964	0.225517	0.449934	0.0723111	0.377148	0.0859854	0.310024	0.463396	0.141439	0.955199	0.181126	0.138258	0.396854	0.188727	0.125428	0.099564	0.453691	0.211518	0.563667	0.327609	0.817408	0.0484655	0.751882	0.0507336	3.8884	0.508818	0.196272	0.0600556	0.232796	0.132541	0.235797
CEBPB	19.6407	36.5071	31.3969	28.087	26.4401	71.7644	25.622	31.4055	12.417	114.179	60.1065	84.7358	55.3139	56.106	48.3952	60.8445	57.6316	67.2827	71.7869	76.8973	69.427	52.3718	36.1374	67.9206	31.8423	152.959	287.697	141.927	28.6536	72.1049	44.852	31.6049	45.8845	54.5883	33.1742	40.3907	45.3468	403.398	137.365	33.2434	211.022	39.2324	81.4008	27.9565	64.6583	87.0727	122.961	156.329	93.5124
HMGA1	23.1802	343.09	254.085	226.115	28.6814	18.0678	82.0381	25.9761	179.624	4.74999	25.3096	296.524	389.175	304.567	161.161	100.644	425.163	273.245	126.708	238.676	154.064	284.944	259.054	158.753	239.264	115.29	119.092	120.675	227.569	201.699	178.079	217.329	145.87	197.543	84.6778	255.407	263.079	78.361	131.552	149.188	354.559	253.012	113.296	321.205	189.777	326.169	273.274	282.518	389.991
SNAI2	2.51024	15.4541	0.69763	2.30765	4.25251	2.67544	1.73571	2.02244	0.415664	13.1331	5.82665	23.9067	27.6557	39.5051	4.47485	105.909	6.69508	28.8642	14.2328	47.2894	16.8508	3.79785	1.5877	21.8472	13.8539	34.1497	68.1065	33.2953	1.10787	28.8236	2.48291	3.03332	21.7731	1.8037	2.7171	4.80408	8.35851	38.9269	68.4409	3.09144	35.1468	0.386171	10.1594	1.4662	14.367	38.541	25.7421	73.4743	2.13063
CLDN18	376.941	0.134371	148.183	0.395512	352.572	125.606	907.439	238.051	166.729	2.73382	246.111	0.0713938	8.91508	1.02211	0.0759619	0.0599144	98.8582	0.411658	1.7724	0.305607	0.0637426	146.702	8.38008	0.327199	1.9397	1.22397	0.0412953	0.312233	161.675	0.309477	772.173	4.55919	0.262042	53.9064	175.869	43.4301	0.425244	0.18427	0.0838025	0.598838	0.549455	1.96236	98.8176	1426.24	4.12097	0.125467	0.511616	1.12738	1.40636
CD274	0.433085	0.756949	1.42879	1.05777	0.582423	0.75155	0.424643	0.332879	0.188367	0.835521	0.363937	9.69888	0.579248	0.586122	1.31253	9.86064	2.16125	2.17328	2.6723	0.778312	4.4383	1.26233	2.5255	0.654435	13.3518	3.03053	1.82796	4.13827	0.919032	0.305292	0.945426	3.10607	8.65065	0.934598	0.941082	1.79162	2.54227	0.660652	0.659594	0.610686	1.72519	0.399005	5.28548	0.716126	1.88942	2.12459	0.489186	1.33969	4.21004
BAX	3.15139	7.09677	14.937	4.98906	4.04866	2.6349	6.1481	2.49429	6.73494	3.55676	4.13759	23.5034	12.6575	10.0418	9.20138	10.8147	10.1859	16.0388	12.1548	9.47397	7.62136	22.5837	12.2688	12.3261	22.9789	12.6841	9.03425	9.15201	13.143	18.0711	13.1086	11.8433	11.3833	11.7991	13.0011	9.552	12.8328	8.38697	8.82326	8.49329	15.405	18.5514	25.6676	21.7184	9.80032	22.3257	12.3956	8.5687	18.871
TP63	0.797346	47.2745	0.496185	17.9761	0.742971	0.0349036	2.15029	0.0171988	0.398503	0.0338196	4.90331	201.271	110.432	156.961	16.2743	130.164	0.132192	151.54	49.2404	76.5811	50.0509	4.0297	0.127346	190.371	89.7754	70.5752	19.9519	112.135	0.0226112	185.55	1.64882	18.8822	202.245	4.31545	0.0199478	0.0572397	81.8511	53.3829	85.3408	0.133268	42.8647	0.430336	0.439158	0.628418	101.882	250.669	138.435	134.463	0.0389951
CSF2	0.0745262	0.141957	0.224762	0	0.0425195	0.0661173	0.0782316	0	0	0.01232	0	0.117327	0.707958	1.18479	0.308413	3.55939	1.62637	0.242331	0.160333	1.11656	0.553095	0.0227998	0.91735	0.227736	0.250339	0.647753	0.285027	1.2549	0.91375	0.0339057	0.170908	1.26565	0.0153797	0.505423	0.0188934	3.44862	0.092154	0.0927012	20.8644	1.21944	0.488086	0.067185	0.157954	2.06956	0.144398	0.13255	0.202409	1.82485	13.9677
MMP9	2.66144	0.892741	7.37263	3.4022	1.48262	0.311849	0.202065	0.530508	1.07925	0.705603	0.660431	9.22306	9.33673	5.54271	1.2617	83.7919	30.8926	16.5579	71.3392	18.3643	4.69656	1.16755	20.2317	2.41042	3.39606	264.889	32.8865	30.564	1.20732	6.2483	13.3439	27.2247	3.57519	0.629286	2.50789	7.89444	4.8821	6.18376	200.697	5.15342	22.1331	1.86359	74.0926	51.9686	2.71942	10.9358	35.2971	58.4475	1.19906
ADIPOQ	0	0.00807285	0.083663	0	0.812452	0.203039	0.106773	0.713303	0.00270558	1.63524	0.117226	0.00667216	0	0.00767585	0.00375833	0	0	0	0.0191475	0.00459012	0.00214456	0	0	0.00323773	0	0	0.00231557	0.0199819	0.00243578	0.00289224	0.00364471	0	0.00524771	0.00374903	0	0.00256922	0	0	0.00469909	0	0.295608	0.0114621	0.875799	0	0.00492701	0	0	0.0047531	0.0143207
[truncated: 122 more columns]
